# Supplementary material for: Theoretical investigation of the spin crossover transition states of the addition of methane to a series of Group 6 metallocenes using minimum energy crossing points
Source: Royal Society of Chemistry journal article supplement (doi:10.1039/b111257k), 2002-01-01
Supplement: b111257k.doc [file b111257k.doc]

Theoretical investigation of the transition states of the addition of methane to a series of Group 6 metallocenes using minimum energy crossing points.

Jennifer C. Green, Jeremy N. Harvey and Rinaldo Poli

SUPPLEMENTARY MATERIAL

Table with total energies of all species, with Cartesian coordinates in Å.

A. Methane

CH4 LanL2DZ -40.514478

C 0.0000 0.0000 0.0000

H 0.6324 0.6324 0.6324

H -0.6324 -0.6324 0.6324

H -0.6324 0.6324 -0.6324

H 0.6324 -0.6324 -0.6324

CH4 LACVP -40.510654

C 0.0000 -0.0002 0.0000

H 0.7990 -0.7456 0.0000

H -0.6180 -0.1268 0.8926

H -0.6180 -0.1268 -0.8926

H 0.4369 1.0017 0.0000

CH4 6-31G** -40.523226

C 0.0000 0.0000 0.0000

H 0.6305 0.6305 0.6305

H -0.6305 -0.6305 0.6305

H -0.6305 0.6305 -0.6305

H 0.6305 -0.6305 -0.6305

B. Cp2Mo system

1Cp2Mo LANL2DZ -454.471565

Mo 0.0001 -0.3216 0.0000

C 0.0008 -0.9779 2.1983

C 1.1906 -0.1698 2.0050

C 0.7316 1.1389 1.5993

C -0.7331 1.1379 1.5994

C -1.1902 -0.1714 2.0052

C -0.7331 1.1379 -1.5994

C 0.7316 1.1389 -1.5993

C 1.1906 -0.1698 -2.0050

C 0.0008 -0.9779 -2.1983

C -1.1902 -0.1714 -2.0052

H -1.3635 1.9929 1.4016

H -2.2117 -0.4767 2.1750

H 0.0015 -2.0307 2.4573

H 2.2126 -0.4736 2.1744

H 1.3607 1.9948 1.4012

H -1.3635 1.9929 -1.4016

H -2.2117 -0.4767 -2.1750

H 0.0015 -2.0307 -2.4573

H 2.2126 -0.4736 -2.1744

H 1.3607 1.9948 -1.4012

1Cp2Mo 6-31G** -454.557207

C -1.4225 -0.9690 1.1225

C -1.5942 -1.5093 -0.2043

C -0.4328 -2.2804 -0.4939

C 0.4429 -2.2375 0.6568

C -0.1725 -1.4422 1.6648

Mo 0.2246 -0.1064 -0.1630

C 0.7109 1.6846 -1.5129

C -0.6357 1.8211 -1.0708

C -0.5984 1.9308 0.3674

C 0.7758 1.9034 0.8057

C 1.5797 1.7348 -0.3573

H -2.1425 -0.3583 1.6481

H -2.4539 -1.3816 -0.8458

H -0.2363 -2.8059 -1.4194

H 1.4069 -2.7236 0.7356

H 0.2123 -1.2555 2.6567

H -1.4575 2.0723 1.0073

H -1.5139 1.8662 -1.6980

H 1.0303 1.5599 -2.5395

H 2.6588 1.6523 -0.3737

H 1.1321 2.0192 1.8188

3Cp2Mo LANL2DZ -454.509978

C -1.0835 2.1378 -0.5164

C -0.6979 2.0710 0.8700

C 0.7483 1.9428 0.9265

C 1.2386 1.9240 -0.4427

C 0.0999 2.0467 -1.3210

Mo -0.0220 -0.0008 -0.0251

C 1.1463 -2.0173 -0.2234

C 0.6582 -1.8619 1.1378

C -0.7925 -1.9273 1.0910

C -1.1835 -2.1284 -0.2809

C 0.0015 -2.1824 -1.0865

H 0.0305 -2.3210 -2.1592

H 2.1825 -2.0734 -0.5264

H 1.2650 -1.8139 2.0309

H -1.4593 -1.8922 1.9415

H -2.1993 -2.2134 -0.6438

H -1.3628 2.1616 1.7178

H -2.0955 2.2294 -0.8884

H 0.1319 2.0646 -2.4023

H 2.2754 1.8977 -0.7480

H 1.3552 1.9662 1.8205

3Cp2Mo 6-31G** -454.593818

C -1.0727 2.1108 -0.5111

C -0.6898 2.0546 0.8614

C 0.7413 1.9344 0.9169

C 1.2267 1.9115 -0.4372

C 0.0993 2.0224 -1.3073

Mo -0.0223 -0.0008 -0.0254

C 1.1348 -2.0036 -0.2198

C 0.6520 -1.8540 1.1270

C -0.7834 -1.9123 1.0809

C -1.1715 -2.1018 -0.2781

C 0.0015 -2.1570 -1.0757

H 0.0293 -2.2771 -2.1507

H 2.1713 -2.0449 -0.5257

H 1.2592 -1.7924 2.0196

H -1.4517 -1.8610 1.9297

H -2.1880 -2.1670 -0.6436

H -1.3572 2.1288 1.7092

H -2.0861 2.1828 -0.8838

H 0.1294 2.0216 -2.3889

H 2.2631 1.8702 -0.7434

H 1.3477 1.9435 1.8121

1Cp2Mo...CH4 eta-2 LANL2DZ

-494.991412

Mo -0.0987 0.0004 0.0000

C -0.6580 0.1324 2.2701

C 0.0013 -1.1437 2.0552

C 1.3277 -0.8350 1.5829

C 1.4738 0.6182 1.5437

C 0.2430 1.2238 2.0031

C 1.4738 0.6182 -1.5437

C 1.3277 -0.8350 -1.5829

C 0.0013 -1.1437 -2.0552

C -0.6580 0.1324 -2.2701

C 0.2430 1.2238 -2.0031

H 2.3796 1.1520 1.2942

H 0.0588 2.2744 2.1673

H -1.6876 0.2485 2.5841

H -0.3929 -2.1240 2.2760

H 2.1050 -1.5549 1.3701

H 2.3796 1.1520 -1.2942

H 0.0588 2.2744 -2.1673

H -1.6876 0.2485 -2.5841

H -0.3929 -2.1240 -2.2760

H 2.1050 -1.5549 -1.3701

C -2.9406 0.0119 0.0000

H -2.5298 1.0300 0.0000

H -3.5476 -0.1295 0.8985

H -3.5476 -0.1295 -0.8985

H -2.1651 -0.7984 0.0000

1Cp2Mo...CH4 eta-2 6-31G**

-495.086387

C -1.5270 -0.8552 1.3411

C -1.8843 -1.1649 -0.0243

C -0.9162 -2.0736 -0.5427

C 0.0420 -2.2838 0.5103

C -0.3396 -1.5785 1.6872

Mo 0.0868 -0.0322 -0.0286

C 0.1794 1.7523 -1.5268

C -1.0365 1.7940 -0.7842

C -0.7084 1.9975 0.6082

C 0.7148 2.0958 0.7416

C 1.2414 1.9012 -0.5672

H -2.0971 -0.2293 2.0131

H -2.7625 -0.8116 -0.5463

H -0.9279 -2.5449 -1.5141

H 0.9365 -2.8874 0.4194

H 0.1434 -1.6129 2.6520

H -1.4223 2.1191 1.4106

H -2.0329 1.7369 -1.1996

H 0.2789 1.6726 -2.5990

H 2.2974 1.8613 -0.8042

H 1.2706 2.3124 1.6413

C 2.6082 -0.9750 -0.8835

H 1.6012 -0.8072 -1.3529

H 2.6668 -0.7183 0.1772

H 2.8341 -2.0342 -1.0131

H 3.3138 -0.3607 -1.4445

1/3Cp2Mo...CH4 MECP LANL2DZ

-494.989790

Mo 0.0212 0.0102 0.0000

C -0.5842 0.1270 2.2390

C 0.0919 -1.1430 2.0410

C 1.4302 -0.8222 1.6074

C 1.5682 0.6323 1.5770

C 0.3194 1.2251 1.9991

C 1.5682 0.6323 -1.5770

C 1.4302 -0.8222 -1.6074

C 0.0919 -1.1430 -2.0410

C -0.5842 0.1270 -2.2390

C 0.3194 1.2251 -1.9991

H 2.4765 1.1735 1.3528

H 0.1181 2.2752 2.1457

H -1.6250 0.2340 2.5181

H -0.3050 -2.1267 2.2382

H 2.2184 -1.5359 1.4155

H 2.4765 1.1735 -1.3528

H 0.1181 2.2752 -2.1457

H -1.6250 0.2340 -2.5181

H -0.3050 -2.1267 -2.2382

H 2.2184 -1.5359 -1.4155

C -3.1618 -0.0092 0.0000

H -2.7642 1.0118 0.0000

H -3.7719 -0.1606 0.8968

H -3.7719 -0.1606 -0.8968

H -2.3522 -0.7653 0.0000

1Cp2Mo...H-CH2-H exch TS

LANL2DZ -494.991336

Mo 0.0000 0.0000 0.1011

C 0.0000 2.2747 0.6625

C 1.1909 2.0306 -0.1208

C 0.7308 1.5569 -1.4049

C -0.7308 1.5569 -1.4049

C -1.1909 2.0306 -0.1208

C -0.7308 -1.5569 -1.4049

C 0.7308 -1.5569 -1.4049

C 1.1909 -2.0306 -0.1208

C 0.0000 -2.2747 0.6625

C -1.1909 -2.0306 -0.1208

H -1.3605 1.3228 -2.2513

H -2.2118 2.2261 0.1697

H 0.0000 2.5927 1.6973

H 2.2118 2.2261 0.1697

H 1.3605 1.3228 -2.2513

H -1.3605 -1.3228 -2.2513

H -2.2118 -2.2261 0.1697

H 0.0000 -2.5927 1.6973

H 2.2118 -2.2261 0.1697

H 1.3605 -1.3228 -2.2513

C 0.0000 0.0000 2.9325

H -0.9271 0.0000 2.3242

H 0.0000 0.8993 3.5539

H 0.0000 -0.8993 3.5539

H 0.9271 0.0000 2.3242

1Cp2Mo...H---CH3 ins TS

LANL2DZ -494.979636

Mo -0.1275 -0.0478 0.0000

C -0.6611 0.4061 2.2732

C -0.2186 -0.9768 2.1689

C 1.1450 -0.9681 1.7267

C 1.5282 0.4212 1.5437

C 0.4116 1.2754 1.9061

C 1.5282 0.4212 -1.5437

C 1.1450 -0.9681 -1.7267

C -0.2186 -0.9768 -2.1689

C -0.6611 0.4061 -2.2732

C 0.4116 1.2754 -1.9061

H 2.5106 0.7661 1.2543

H 0.4076 2.3546 1.9397

H -1.6465 0.7264 2.5805

H -0.7968 -1.8522 2.4261

H 1.7830 -1.8314 1.6048

H 2.5106 0.7661 -1.2543

H 0.4076 2.3546 -1.9397

H -1.6465 0.7264 -2.5805

H -0.7968 -1.8522 -2.4261

H 1.7830 -1.8314 -1.6048

C -2.5529 0.0449 0.0000

H -2.5569 1.1404 0.0000

H -3.0824 -0.3086 0.8914

H -3.0824 -0.3086 -0.8914

H -1.5828 -1.0049 0.0000

1Cp2Mo(H)(CH3) LANL2DZ

-495.008922

C -0.7581 1.9846 -0.9140

C -0.7373 1.9917 0.5374

C 0.6384 1.9733 0.9839

C 1.4592 1.9241 -0.2074

C 0.5946 1.9598 -1.3582

Mo 0.1831 -0.0594 -0.0273

C -1.7593 -1.5019 -0.0137

C -0.6459 -2.3580 -0.2481

C 0.2637 -2.2490 0.8628

C -0.3084 -1.3429 1.8361

C -1.5551 -0.8687 1.2764

C 1.0857 -0.8125 -1.9491

H -2.2569 -0.2120 1.7692

H -2.6120 -1.3713 -0.6648

H -0.4851 -2.9499 -1.1366

H 1.1910 -2.7906 0.9736

H 0.0864 -1.1265 2.8174

H -1.6051 2.0755 1.1752

H -1.6359 2.0210 -1.5435

H 0.9167 1.9205 -2.3880

H 2.5385 1.9136 -0.2301

H 0.9920 2.0559 2.0006

H 1.4663 -1.8328 -1.8216

H 0.3340 -0.8030 -2.7525

H 1.9386 -0.1898 -2.2439

H 1.7760 -0.4185 0.3494

1Cp2Mo(H)(CH3) 6-31G**

-495.104025

C -0.7517 1.9611 -0.9036

C -0.7286 1.9837 0.5327

C 0.6333 1.9673 0.9739

C 1.4445 1.9071 -0.2049

C 0.5880 1.9267 -1.3439

Mo 0.1773 -0.0564 -0.0221

C -1.7414 -1.4826 -0.0126

C -0.6343 -2.3233 -0.2512

C 0.2602 -2.2280 0.8545

C -0.3096 -1.3409 1.8239

C -1.5431 -0.8693 1.2714

C 1.0883 -0.8148 -1.9551

H -2.2381 -0.2024 1.7609

H -2.5848 -1.3350 -0.6723

H -0.4689 -2.9031 -1.1468

H 1.1938 -2.7609 0.9569

H 0.0904 -1.1198 2.8023

H -1.5967 2.0549 1.1720

H -1.6302 1.9762 -1.5331

H 0.9084 1.8728 -2.3735

H 2.5238 1.8838 -0.2288

H 0.9873 2.0427 1.9913

H 1.4708 -1.8310 -1.8335

H 0.3524 -0.8112 -2.7678

H 1.9411 -0.1999 -2.2521

H 1.7677 -0.4169 0.3428

C. Cp2W system

1Cp2W LANL2DZ -454.737988

W 0.2215 -0.0007 0.0000

C 0.9509 -0.0077 2.1622

C 0.1445 1.1908 1.9741

C -1.1877 0.7425 1.6014

C -1.1977 -0.7273 1.5999

C 0.1282 -1.1947 1.9719

C -1.1977 -0.7273 -1.5999

C -1.1877 0.7425 -1.6014

C 0.1445 1.1908 -1.9741

C 0.9509 -0.0077 -2.1622

C 0.1282 -1.1947 -1.9719

H -2.0630 -1.3528 1.4380

H 0.4244 -2.2177 2.1473

H 2.0026 -0.0152 2.4216

H 0.4548 2.2094 2.1511

H -2.0444 1.3803 1.4412

H -2.0630 -1.3528 -1.4380

H 0.4244 -2.2177 -2.1473

H 2.0026 -0.0152 -2.4216

H 0.4548 2.2094 -2.1511

H -2.0444 1.3803 -1.4412

1Cp2W 6-31G** -454.825354

C -0.4700 -1.3187 1.7031

C 0.7256 -0.5241 1.8972

C 0.3479 0.8706 1.9977

C -1.0771 0.9336 1.8457

C -1.5794 -0.4102 1.6654

W -0.1750 0.0748 -0.0585

C 0.6638 -1.2972 -1.6543

C -0.2446 -0.3848 -2.2865

C 0.2589 0.9590 -2.1097

C 1.4845 0.8921 -1.3673

C 1.7292 -0.5051 -1.0745

H 2.5943 -0.8969 -0.5598

H 0.5959 -2.3750 -1.6655

H -1.1502 -0.6577 -2.8116

H -0.2060 1.8630 -2.4800

H 2.1316 1.7232 -1.1285

H 1.7271 -0.9132 2.0081

H -0.5266 -2.3963 1.6584

H -2.6168 -0.6857 1.5311

H -1.6749 1.8350 1.8688

H 1.0040 1.7018 2.2099

3Cp2W LANL2DZ -454.768378

W -0.0066 0.0002 0.0000

C -1.1974 0.0378 -2.0117

C -0.3297 1.1887 -2.0625

C 1.0328 0.7352 -2.0184

C 1.0311 -0.7110 -1.9413

C -0.3607 -1.1536 -1.9383

C 0.2715 1.1787 1.9499

C -1.0832 0.6298 1.9255

C -0.9690 -0.8169 1.9958

C 0.4277 -1.1558 2.0666

C 1.1958 0.0602 2.0346

H 1.9025 -1.3487 -1.9797

H -0.7043 -2.1753 -2.0078

H -2.2759 0.0539 -2.0818

H -0.6521 2.2201 -2.1095

H 1.9084 1.3694 -2.0413

H 0.5341 2.2245 2.0168

H 2.2731 0.1278 2.0974

H 0.8299 -2.1589 2.1136

H -1.7919 -1.5177 2.0193

H -2.0018 1.1963 1.9715

3Cp2W 6-31G** -454.856534

C -1.0228 1.9687 -0.5387

C -1.0233 1.9583 0.8934

C 0.3240 1.9567 1.3438

C 1.1843 1.9643 0.2029

C 0.3544 1.9775 -0.9789

W -0.0050 -0.0027 0.0243

C 0.4115 -2.1819 0.8994

C -0.9362 -2.1449 0.4515

C -0.9403 -1.8508 -0.9500

C 0.4344 -1.7076 -1.3746

C 1.2672 -1.9106 -0.2124

H -1.8104 -2.2933 1.0710

H -1.8125 -1.8136 -1.5876

H 0.7784 -1.5839 -2.3917

H 2.3482 -1.9110 -0.1945

H 0.7333 -2.3554 1.9177

H 2.2643 2.0067 0.2244

H 0.6437 1.9234 2.3769

H -1.8997 1.9345 1.5271

H -1.8960 2.0308 -1.1728

H 0.6979 2.0873 -1.9978

1Cp2W...CH4 eta-2 LANL2DZ

-495.257894

W -0.0775 -0.0028 0.0000

C -0.6529 0.1237 2.2521

C 0.0151 -1.1484 2.0315

C 1.3457 -0.8259 1.5564

C 1.4784 0.6326 1.5185

C 0.2323 1.2302 1.9688

C 1.4784 0.6326 -1.5185

C 1.3457 -0.8259 -1.5564

C 0.0151 -1.1484 -2.0315

C -0.6529 0.1237 -2.2521

C 0.2323 1.2302 -1.9688

H 2.3811 1.1763 1.2817

H 0.0461 2.2765 2.1543

H -1.6809 0.2308 2.5722

H -0.3602 -2.1312 2.2710

H 2.1331 -1.5394 1.3625

H 2.3811 1.1763 -1.2817

H 0.0461 2.2765 -2.1543

H -1.6809 0.2308 -2.5722

H -0.3602 -2.1312 -2.2710

H 2.1331 -1.5394 -1.3625

C -2.8290 0.0152 0.0000

H -2.4587 1.0487 0.0000

H -3.4268 -0.1512 0.8996

H -3.4268 -0.1512 -0.8996

H -2.0402 -0.8045 0.0000

1Cp2W...CH4 eta-2 6-31G**

-495.355045

C -0.4568 -1.2666 1.8749

C 0.8761 -0.7235 1.8811

C 0.7979 0.7215 1.9253

C 0.5861 1.0915 1.9540

C -1.3324 -0.1385 1.9008

W -0.0712 0.0107 -0.0240

C 0.7801 -1.2434 -1.7816

C 0.0911 -0.1148 -2.3211

C 0.7086 1.1154 -1.8990

C 1.7955 0.7446 -1.0421

C 1.8411 -0.7009 -0.9742

H 2.5844 -1.2826 -0.4485

H 0.6028 -2.2837 -2.0075

H -0.7947 -0.1798 -2.9398

H 0.4545 2.1146 -2.2189

H 2.5020 1.4262 -0.5901

H 1.7864 -1.3050 1.9056

H -0.7340 -2.3079 1.9354

H -2.4120 -0.2035 1.8559

H -0.9824 2.0892 2.0671

H 1.6336 1.4026 2.0012

C -2.6477 0.2677 -0.8906

H -1.7895 0.9670 -0.5979

H -2.4639 -0.8069 -0.8342

H -3.4615 0.5346 -0.2159

H -2.8886 0.5433 -1.9175

1/3Cp2W-CH4 MECP LANL2DZ

-495.254449

W 0.0659 0.0098 0.0000

C -0.5920 0.1257 2.2346

C 0.0835 -1.1423 2.0257

C 1.4332 -0.8256 1.5933

C 1.5720 0.6342 1.5630

C 0.3104 1.2277 1.9777

C 1.5720 0.6342 -1.5630

C 1.4332 -0.8256 -1.5933

C 0.0835 -1.1423 -2.0257

C -0.5920 0.1257 -2.2346

C 0.3104 1.2277 -1.9777

H 2.4827 1.1774 1.3576

H 0.1163 2.2758 2.1466

H -1.6300 0.2330 2.5223

H -0.3073 -2.1257 2.2387

H 2.2230 -1.5417 1.4200

H 2.4827 1.1774 -1.3576

H 0.1163 2.2758 -2.1466

H -1.6300 0.2330 -2.5223

H -0.3073 -2.1257 -2.2387

H 2.2230 -1.5417 -1.4200

C -3.1656 -0.0092 0.0000

H -2.7643 1.0109 0.0000

H -3.7738 -0.1601 0.8978

H -3.7738 -0.1601 -0.8978

H -2.3552 -0.7639 0.0000

1Cp2W...H-CH2-H exch TS

LANL2DZ -495.257625

W 0.0000 0.0000 0.0793

C 0.0000 2.2568 0.6563

C 1.1954 2.0018 -0.1223

C 0.7329 1.5309 -1.4150

C -0.7329 1.5309 -1.4150

C -1.1954 2.0018 -0.1223

C -0.7329 -1.5309 -1.4150

C 0.7329 -1.5309 -1.4150

C 1.1954 -2.0018 -0.1223

C 0.0000 -2.2568 0.6563

C -1.1954 -2.0018 -0.1223

H -1.3638 1.3127 -2.2641

H -2.2142 2.2181 0.1591

H 0.0000 2.5818 1.6883

H 2.2142 2.2181 0.1591

H 1.3638 1.3127 -2.2641

H -1.3638 -1.3127 -2.2641

H -2.2142 -2.2181 0.1591

H 0.0000 -2.5818 1.6883

H 2.2142 -2.2181 0.1591

H 1.3638 -1.3127 -2.2641

C 0.0000 0.0000 2.8171

H -0.9379 0.0000 2.2140

H 0.0000 0.9008 3.4345

H 0.0000 -0.9008 3.4345

H 0.9379 0.0000 2.2140

1Cp2W...H---CH3 ins TS

LANL2DZ -495.254179

W 0.0000 0.0948 -0.0265

C -2.2534 0.6404 0.3605

C -2.1304 0.1626 -1.0078

C -1.6587 -1.1984 -0.9491

C -1.5106 -1.5467 0.4604

C -1.8830 -0.4013 1.2796

C 1.5107 -1.5465 0.4607

C 1.6588 -1.1986 -0.9489

C 2.1304 0.1624 -1.0080

C 2.2534 0.6406 0.3603

C 1.8830 -0.4009 1.2797

H -1.2356 -2.5202 0.8383

H -1.9670 -0.3734 2.3551

H -2.5697 1.6329 0.6490

H -2.3953 0.7032 -1.9040

H -1.5353 -1.8641 -1.7905

H 1.2357 -2.5200 0.8386

H 1.9671 -0.3730 2.3551

H 2.5695 1.6331 0.6488

H 2.3953 0.7031 -1.9041

H 1.5354 -1.8643 -1.7902

C -0.0001 2.5832 0.0447

H -0.0000 2.5268 1.1371

H -0.8937 3.1262 -0.2791

H 0.8934 3.1262 -0.2793

H -0.0004 1.6668 -0.9090

1Cp2W(H)(CH3) LANL2DZ

-495.300378

W -0.1026 0.1184 -0.0339

C 0.1135 -0.4357 -2.4142

C 0.5641 0.9047 -2.1756

C 1.6905 0.8603 -1.2604

C 1.8944 -0.5412 -0.9300

C 0.9028 -1.3392 -1.6387

C 0.9448 -0.5586 1.8815

C 0.5784 0.8403 2.0361

C -0.8723 0.8801 2.0819

C -1.3716 -0.4607 1.9840

C -0.2713 -1.3597 1.8355

H 2.7071 -0.9353 -0.3396

H 0.8179 -2.4159 -1.6328

H -0.7308 -0.7134 -3.0268

H 0.1476 1.7973 -2.6174

H 2.3204 1.6920 -0.9848

H 1.9502 -0.9502 1.9001

H -0.3323 -2.4359 1.7680

H -2.4137 -0.7409 1.9565

H -1.4739 1.7698 2.1909

H 1.2442 1.6720 2.2074

C -2.2070 -0.2010 -0.7451

H -2.3685 0.2715 -1.7226

H -2.4536 -1.2713 -0.8304

H -2.9285 0.2686 -0.0642

H -0.6942 1.6927 -0.2242

1Cp2W(H)(CH3) 6-31G**

-495.396903

W -0.0973 0.1157 -0.0322

C 0.1047 -0.4311 -2.3795

C 0.5563 0.8957 -2.1536

C 1.6789 0.8531 -1.2582

C 1.8846 -0.5330 -0.9328

C 0.8964 -1.3254 -1.6208

C 0.9351 -0.5510 1.8780

C 0.5711 0.8328 2.0273

C -0.8646 0.8718 2.0599

C -1.3577 -0.4550 1.9514

C -0.2661 -1.3455 1.8177

H 2.6897 -0.9236 -0.3288

H 0.8012 -2.4014 -1.6003

H -0.7497 -0.7093 -2.9779

H 0.1268 1.7882 -2.5836

H 2.3008 1.6884 -0.9737

H 1.9424 -0.9394 1.8811

H -0.3271 -2.4208 1.7322

H -2.3994 -0.7350 1.9066

H -1.4687 1.7620 2.1516

H 1.2363 1.6679 2.1868

C -2.2163 -0.1961 -0.7487

H -2.3821 0.2782 -1.7202

H -2.4813 -1.2572 -0.8421

H -2.9379 0.2721 -0.0732

H -0.6956 1.6812 -0.2244

D. CH2(C5H4)2Mo (a-Mo) System

1a-Mo LANL2DZ -492.553931

C 1.1883 1.5904 -0.5020

C 0.0000 1.1634 -1.2531

C -1.1883 1.5904 -0.5020

C -0.7319 2.2291 0.7012

C 0.7319 2.2291 0.7012

Mo 0.0000 0.0000 0.6445

C -1.1883 -1.5904 -0.5020

C 0.0000 -1.1634 -1.2531

C 1.1883 -1.5904 -0.5020

C 0.7319 -2.2291 0.7012

C -0.7319 -2.2291 0.7012

C 0.0000 0.0000 -2.2575

H -1.3649 -2.6828 1.4510

H -2.2163 -1.4887 -0.8192

H 2.2163 -1.4887 -0.8192

H 1.3649 -2.6828 1.4510

H 2.2163 1.4887 -0.8192

H -1.3649 2.6828 1.4510

H -2.2163 1.4887 -0.8192

H 1.3649 2.6828 1.4510

H 0.8884 0.0000 -2.8968

H -0.8884 0.0000 -2.8968

1a-Mo 6-31G** -492.649122

C -0.4366 1.6215 -1.1394

C -0.4286 1.6127 0.3158

C 0.9589 1.6209 0.7551

C 1.7760 1.5984 -0.4087

C 0.9172 1.5987 -1.5746

Mo 0.4458 -0.3029 -0.3286

C -0.2602 -1.1477 1.6530

C -1.3245 -0.4221 0.9757

C -1.6559 -1.1480 -0.2414

C -0.7862 -2.2706 -0.3198

C 0.0726 -2.2705 0.8462

C -1.5786 1.0721 1.1628

H 0.8230 -3.0138 1.0798

H 0.1728 -0.9014 2.6125

H -2.4439 -0.9021 -0.9394

H -0.7866 -3.0140 -1.1057

H -1.3096 1.6748 -1.7748

H 2.8577 1.6074 -0.4192

H 1.3067 1.6735 1.7773

H 1.2480 1.6079 -2.6044

H -2.5567 1.3798 0.7833

H -1.5066 1.3798 2.2094

3a-Mo LANL2DZ -492.569399

C 1.1784 1.6421 -0.4859

C 0.0000 1.1939 -1.2319

C -1.1784 1.6421 -0.4859

C -0.7176 2.3667 0.6735

C 0.7176 2.3667 0.6735

Mo 0.0000 0.0000 0.6384

C -1.1784 -1.6421 -0.4859

C 0.0000 -1.1939 -1.2319

C 1.1784 -1.6421 -0.4859

C 0.7176 -2.3667 0.6735

C -0.7176 -2.3667 0.6735

C 0.0000 0.0000 -2.2126

H -1.3508 -2.8477 1.4069

H -2.2084 -1.5263 -0.7934

H 2.2084 -1.5263 -0.7934

H 1.3508 -2.8477 1.4069

H 2.2084 1.5263 -0.7934

H -1.3508 2.8477 1.4069

H -2.2084 1.5263 -0.7934

H 1.3508 2.8477 1.4069

H 0.8875 0.0000 -2.8540

H -0.8875 0.0000 -2.8540

3a-Mo 6-31G** -492.662103

C -0.4045 1.6570 -1.1517

C -0.4064 1.6325 0.2993

C 0.9798 1.6569 0.7279

C 1.7985 1.7159 -0.4420

C 0.9555 1.7160 -1.5865

Mo 0.4417 -0.3000 -0.3254

C -0.2758 -1.1950 1.6528

C -1.3260 -0.4561 0.9767

C -1.6602 -1.1950 -0.2267

C -0.8417 -2.3659 -0.2628

C 0.0014 -2.3658 0.8817

C -1.5519 1.0539 1.1430

H 0.7242 -3.1299 1.1355

H 0.1685 -0.9426 2.6058

H -2.4385 -0.9425 -0.9338

H -0.8697 -3.1300 -1.0283

H -1.2770 1.6956 -1.7894

H 2.8793 1.7650 -0.4519

H 1.3299 1.6952 1.7503

H 1.2855 1.7651 -2.6157

H -2.5307 1.3624 0.7654

H -1.4816 1.3625 2.1898

1a-Mo...H-CH3 eta-2 LANL2DZ

-533.075520

C -0.3489 -0.8251 2.2294

C 0.8784 -1.1558 1.5653

C 1.5266 0.1000 1.1666

C 0.6826 1.2078 1.6237

C -0.4711 0.6332 2.2533

Mo -0.3804 -0.0433 0.0000

C -0.4711 0.6332 -2.2533

C 0.6826 1.2078 -1.6237

C 1.5266 0.1000 -1.1666

C 0.8784 -1.1558 -1.5653

C -0.3489 -0.8251 -2.2294

C 2.5223 0.2002 0.0000

C -3.2427 0.1126 0.0000

H -1.0309 -1.5290 2.6841

H 1.2819 -2.1496 1.4312

H 0.9093 2.2611 1.5405

H -1.2776 1.1901 2.7106

H 0.9093 2.2611 -1.5405

H -1.0309 -1.5290 -2.6841

H 1.2819 -2.1496 -1.4312

H -1.2776 1.1901 -2.7106

H 3.0687 1.1487 0.0000

H 3.2488 -0.6189 0.0000

H -2.8649 1.1386 0.0000

H -2.4459 -0.6828 0.0000

H -3.8434 -0.0543 0.8990

H -3.8434 -0.0543 -0.8990

1a-Mo...H-CH3 eta-2 6-31G**

C 0.5653 0.7584 -2.1845

C 1.2457 1.3306 -1.0772

C 1.8648 0.2496 -0.3274

C 1.5674 -0.9951 -1.0130

C 0.7575 -0.6758 -2.1347

Mo -0.3284 -0.0362 -0.1744

C -1.3241 -0.7443 1.8107

C 0.0636 -1.0445 1.8370

C 0.7794 0.2142 1.7296

C -0.2047 1.2831 1.6708

C -1.4943 0.6907 1.7187

C 2.1909 0.3467 1.1615

C -2.7389 -0.8213 -1.4563

H 0.0277 1.3031 -2.9477

H 1.3248 2.3857 -0.8539

H 1.9228 -1.9783 -0.7381

H 0.3646 -1.3889 -2.8473

H 0.5055 -2.0247 1.9492

H -2.4355 1.2221 1.7211

H 0.0088 2.3427 1.6387

H -2.1237 -1.4708 1.87000

H 2.8497 -0.4595 1.4953

H 2.6585 1.2997 1.4247

H -2.2254 -1.7436 -1.1867

H -2.2114 0.1275 -1.1552

H -2.8559 -0.7708 -2.5396

H -3.7117 -0.7872 -0.9634

1a-Mo(H)(CH3) LANL2DZ

-533.097300

C -0.5622 1.7545 -1.0985

C -0.5667 1.7451 0.3601

C 0.8254 1.7650 0.8096

C 1.6557 1.7889 -0.3545

C 0.8202 1.7625 -1.5215

Mo 0.2794 -0.2382 -0.3175

C -0.5421 -1.0717 1.7348

C -1.5421 -0.2783 1.0200

C -1.8886 -0.9968 -0.2011

C -1.0913 -2.2025 -0.2282

C -0.2907 -2.2486 0.9624

C -1.7412 1.2328 1.2061

C 2.2791 -1.2109 -0.3440

H 0.4216 -3.0216 1.2119

H -0.1006 -0.8344 2.6924

H -2.6429 -0.7180 -0.9219

H -1.1162 -2.9549 -1.0023

H -1.4248 1.8088 -1.7461

H 2.7360 1.7794 -0.3540

H 1.1677 1.7965 1.8344

H 1.1640 1.7749 -2.5450

H -2.7076 1.5731 0.8209

H -1.6604 1.5359 2.2548

H 2.1839 -2.2726 -0.6063

H 2.9196 -0.7470 -1.1053

H 2.7608 -1.1208 0.6417

H 0.4427 -0.8323 -1.8979

1a-Mo(H)(CH3) 6-31G**

-533.2011308

C -1.5787 -0.9977 -1.0231

C -1.1661 -1.4155 0.2975

C -1.6262 -0.4140 1.2389

C -2.3045 0.5877 0.5004

C -2.2675 0.2480 -0.8783

Mo -0.0000 0.4255 -0.2030

C 1.6262 -0.4137 1.2389

C 1.1663 -1.4154 0.2976

C 1.5789 -0.9976 -1.0231

C 2.2675 0.2483 -0.8783

C 2.3045 0.5879 0.5004

C 0.0002 -2.3646 0.5589

C -0.0003 2.5608 0.4676

H 2.7349 1.4884 0.9146

H 1.5002 -0.4356 2.3124

H 1.4379 -1.5426 -1.9453

H 2.6942 0.8287 -1.6831

H -1.4377 -1.5428 -1.9453

H -2.7348 1.4882 0.9146

H -1.5002 -0.4359 2.3124

H -2.6944 0.8284 -1.6831

H 0.0002 -3.2178 -0.1248

H 0.0001 -2.7475 1.5828

H 0.8764 3.0898 0.0830

H -0.8769 3.0898 0.0826

H -0.0006 2.6282 1.5622

H -0.0000 1.3252 -1.6396

E. CH2(C5H4)2W (a-W) System

1a-W LANL2Dz -492.816033

W 0.0000 0.0000 0.4921

C 0.0000 1.1645 -1.3950

C -1.1929 1.5641 -0.6243

C -0.7326 2.1964 0.5932

C 0.7326 2.1964 0.5932

C 1.1929 1.5641 -0.6243

C 0.0000 -1.1645 -1.3950

C 1.1929 -1.5641 -0.6243

C 0.7326 -2.1964 0.5932

C -0.7326 -2.1964 0.5932

C -1.1929 -1.5641 -0.6243

H 1.3666 2.6522 1.3403

H 2.2204 1.4889 -0.9489

H -2.2204 1.4889 -0.9489

H -1.3666 2.6522 1.3403

H -2.2204 -1.4889 -0.9489

H 1.3666 -2.6522 1.3403

H 2.2204 -1.4889 -0.9489

H -1.3666 -2.6522 1.3403

C 0.0000 0.0000 -2.4021

H -0.8881 0.0000 -3.0414

H 0.8881 0.0000 -3.0414

1a-W 6-31G** -492.913429

C -0.5330 1.6576 -1.0731

C -0.5257 1.6822 0.3875

C 0.8669 1.6567 0.8280

C 1.6894 1.6215 -0.3439

C 0.8303 1.6218 -1.5104

W 0.3398 -0.2309 -0.2508

C -0.3327 -1.0684 1.7117

C -1.4238 -0.3581 1.0493

C -1.7336 -1.0691 -0.1885

C -0.8492 -2.1923 -0.2735

C 0.0104 -2.1920 0.8927

C -1.6773 1.1391 1.2357

H 0.7608 -2.9342 1.1282

H 0.0854 -0.8411 2.6822

H -2.5370 -0.8423 -0.8752

H -0.8515 -2.9345 -1.0599

H -1.4011 1.7374 -1.7121

H 2.7707 1.6309 -0.3520

H 1.2192 1.7349 1.8468

H 1.1591 1.6316 -2.5406

H -2.6554 1.4466 0.8565

H -1.6056 1.4470 2.2821

3a-W LANL2DZ -492.829515

W -0.4411 0.0000 -0.2232

C 1.7710 0.0000 -0.4367

C 1.2773 -1.1841 -1.1557

C 0.5354 -0.7191 -2.3082

C 0.5354 0.7191 -2.3082

C 1.2773 1.1841 -1.1557

C 0.6982 0.0000 1.6857

C -0.1734 1.1840 1.7138

C -1.5415 0.7191 1.7993

C -1.5415 -0.7191 1.7993

C -0.1734 -1.1840 1.7138

H 0.0682 1.3514 -3.0501

H 1.5172 2.2133 -0.9316

H 1.5172 -2.2133 -0.9316

H 0.0682 -1.3514 -3.0501

H 0.1491 -2.2132 1.7747

H -2.4158 1.3515 1.8630

H 0.1491 2.2132 1.7747

H -2.4158 -1.3515 1.8630

C 2.1161 0.0000 1.0697

H 2.6881 -0.8875 1.3585

H 2.6881 0.8875 1.3585

3a-W 6-31G** -492.926145

C -0.5106 1.6911 -1.0793

C -0.5113 1.6991 0.3767

C 0.8793 1.6909 0.8080

C 1.6989 1.7200 -0.3672

C 0.8549 1.7200 -1.5132

W 0.3425 -0.2327 -0.2524

C -0.3517 -1.1053 1.7148

C -1.4277 -0.3823 1.0518

C -1.7419 -1.1054 -0.1723

C -0.8990 -2.2633 -0.2215

C -0.0548 -2.2632 0.9244

C -1.6588 1.1265 1.2219

H 0.6902 -3.0106 1.1608

H 0.0794 -0.8679 2.6773

H -2.5334 -0.8680 -0.8693

H -0.9039 -3.0107 -1.0030

H -1.3799 1.7517 -1.7191

H 2.7801 1.7364 -0.3784

H 1.2323 1.7510 1.8280

H 1.1864 1.7366 -2.5425

H -2.6375 1.4349 0.8443

H -1.5885 1.4351 2.2685

1a-W...H-CH3 eta-2 LANL2DZ

-533.340272

W 0.3028 -0.0537 0.0000

C -1.5914 0.1753 1.1693

C -0.9920 -1.1264 1.5155

C 0.2578 -0.8783 2.1938

C 0.4557 0.5694 2.2374

C -0.6722 1.2283 1.6224

C -1.5914 0.1753 -1.1693

C -0.6722 1.2283 -1.6224

C 0.4557 0.5694 -2.2374

C 0.2578 -0.8783 -2.1938

C -0.9920 -1.1264 -1.5155

H 1.2962 1.0755 2.6924

H -0.8493 2.2932 1.5881

H -1.4562 -2.0931 1.3835

H 0.8895 -1.6269 2.6480

H -1.4562 -2.0931 -1.3835

H 1.2962 1.0755 -2.6924

H -0.8493 2.2932 -1.5881

H 0.8895 -1.6269 -2.6480

C -2.5796 0.3416 0.0000

H -3.3587 -0.4275 0.0000

H -3.0610 1.3243 0.0000

C 3.0173 0.2297 0.0000

H 2.6672 1.2629 0.0000

H 3.6122 0.0475 0.8996

H 3.6122 0.0475 -0.8996

H 2.2419 -0.6272 0.0000

1a-W...H-CH3 eta-2 6-31G**

-533.447667

C 0.0831 -1.0465 1.8471

C 0.8445 0.1914 1.7687

C -0.1067 1.2931 1.6690

C -1.4263 0.7467 1.7184

C -1.3000 -0.6902 1.8101

W -0.2632 -0.0208 -0.1379

C 1.2954 1.3394 -0.9979

C 1.9317 0.2278 -0.2994

C 1.5835 -0.9969 -1.0046

C 0.7641 -0.6229 -2.1135

C 0.5954 0.8127 -2.1269

C 2.2604 0.2818 1.1943

H 0.0750 1.3920 -2.8754

H 1.4097 2.3879 -0.7588

H 1.9461 -1.9910 -0.7841

H 0.3449 -1.3118 -2.8349

H 0.4837 -2.0396 1.9940

H -2.3462 1.3129 1.7292

H 0.1412 2.3457 1.6583

H -2.1227 -1.3916 1.8545

H 2.8873 -0.5565 1.5088

H 2.7657 1.2099 1.4764

C -2.5069 -0.9431 -1.3455

H -2.0141 -1.8749 -1.0807

H -2.0131 0.0701 -1.0791

H -2.6262 -0.8868 -2.4283

H -3.4764 -0.8863 -0.8489

1/3 a-W...CH4 MECP LANL2DZ

-533.333696

W 0.1465 -0.0800 -0.0000

C -1.7268 0.1668 1.1715

C -1.1359 -1.1278 1.5567

C 0.1195 -0.8601 2.2198

C 0.3293 0.5818 2.2320

C -0.7988 1.2281 1.5962

C -1.7268 0.1668 -1.1715

C -0.7988 1.2281 -1.5962

C 0.3293 0.5818 -2.2320

C 0.1195 -0.8601 -2.2198

C -1.1359 -1.1278 -1.5567

H 1.1689 1.0935 2.6809

H -0.9705 2.2928 1.5392

H -1.6021 -2.0968 1.4546

H 0.7608 -1.6024 2.6722

H -1.6021 -2.0968 -1.4546

H 1.1689 1.0935 -2.6809

H -0.9705 2.2928 -1.5392

H 0.7608 -1.6024 -2.6722

C -2.7163 0.3224 0.0000

H -3.4872 -0.4549 0.0000

H -3.2079 1.3003 0.0000

C 3.6225 0.1922 -0.0000

H 3.1184 1.1639 -0.0000

H 4.2433 0.1027 0.8981

H 4.2433 0.1027 -0.8981

H 2.8789 -0.6224 -0.0000

1a-W...H-CH2-H exch. TS

LANL2DZ -533.333696

W 0.0000 0.0000 0.2984

C 0.0000 1.1672 -1.6121

C -1.1897 1.5652 -0.8427

C -0.7324 2.2120 0.3643

C 0.7324 2.2120 0.3643

C 1.1897 1.5652 -0.8427

C 0.0000 -1.1672 -1.6121

C 1.1897 -1.5652 -0.8427

C 0.7324 -2.2120 0.3643

C -0.7324 -2.2120 0.3643

C -1.1897 -1.5652 -0.8427

H 1.3683 2.6687 1.1092

H 2.2169 1.4783 -1.1659

H -2.2169 1.4783 -1.1659

H -1.3683 2.6687 1.1092

H -2.2169 -1.4783 -1.1659

H 1.3683 -2.6687 1.1092

H 2.2169 -1.4783 -1.1659

H -1.3683 -2.6687 1.1092

C 0.0000 0.0000 -2.6149

H -0.8884 0.0000 -3.2542

H 0.8884 0.0000 -3.2542

C 0.0000 0.0000 3.1162

H 0.9268 0.0000 2.5042

H 0.0000 0.9031 3.7312

H 0.0000 -0.9031 3.7312

H -0.9268 0.0000 2.5042

1a-W--H---CH3 ins. TS LANL2DZ

-533.338629

W -0.0005 0.3209 -0.0722

C 1.1756 -1.5722 0.2046

C 1.5278 -1.0037 -1.1072

C 2.2129 0.2454 -0.8802

C 2.2579 0.4731 0.5566

C 1.6287 -0.6304 1.2373

C -1.1702 -1.5761 0.2044

C -1.6264 -0.6359 1.2372

C -2.2592 0.4656 0.5566

C -2.2133 0.2382 -0.8803

C -1.5241 -1.0086 -1.1074

H 2.7068 1.3278 1.0435

H 1.5867 -0.7817 2.3059

H 1.3977 -1.4870 -2.0647

H 2.6546 0.8708 -1.6414

H -1.3925 -1.4914 -2.0649

H -2.7109 1.3188 1.0435

H -1.5841 -0.7872 2.3058

H -2.6568 0.8624 -1.6415

C 0.0043 -2.5543 0.3906

H 0.0057 -3.3487 -0.3629

H 0.0050 -3.0167 1.3824

C -0.0060 2.7952 0.3009

H -0.0036 2.5901 1.3737

H 0.8864 3.3810 0.0561

H -0.9032 3.3746 0.0588

H -0.0039 2.0218 -0.7283

1a-W(H)(CH3) LANL2DZ

-533.390402

W -0.3194 -0.1365 -0.1708

C 1.9031 0.2167 -0.3077

C 1.6145 -1.0684 -0.9487

C 0.8531 -0.7777 -2.1504

C 0.6825 0.6396 -2.2568

C 1.2952 1.2728 -1.1251

C 0.8182 0.1816 1.7495

C -0.2146 1.2239 1.7376

C -1.4854 0.5693 1.8541

C -1.2811 -0.8470 1.8970

C 0.1446 -1.1159 1.8390

H 0.1270 1.1489 -3.0307

H 1.3621 2.3376 -0.9551

H 1.9922 -2.0368 -0.6574

H 0.4845 -1.5121 -2.8506

H 0.6120 -2.0814 1.9604

H -2.4449 1.0653 1.8462

H -0.0517 2.2918 1.7252

H -2.0565 -1.5946 1.9685

C 2.2322 0.3656 1.1834

H 2.9246 -0.4052 1.5354

H 2.6549 1.3463 1.4230

C -2.1274 0.7399 -1.1097

H -2.2184 0.4161 -2.1562

H -3.0377 0.3899 -0.6028

H -2.1145 1.8414 -1.0843

H -1.2045 -1.5134 -0.6606

1a-W(H)(CH3) 6-31G**

-533.496319

W -0.3097 -0.1323 -0.1656

C 1.8894 0.2145 -0.3122

C 1.6021 -1.0619 -0.9395

C 0.8432 -0.7838 -2.1269

C 0.6622 0.6164 -2.2352

C 1.2749 1.2539 -1.1217

C 0.8066 0.1794 1.7408

C -0.2230 1.2054 1.7185

C -1.4788 0.5471 1.8243

C -1.2675 -0.8522 1.8751

C 0.1448 -1.1091 1.8237

H 0.0912 1.1174 -3.0037

H 1.3304 2.3202 -0.9540

H 1.9719 -2.0304 -0.6357

H 0.4607 -1.5240 -2.8144

H 0.6180 -2.0743 1.9314

H -2.4424 1.0354 1.8004

H -0.0682 2.2749 1.6980

H -2.0403 -1.6049 1.9278

C 2.2083 0.3689 1.1709

H 2.9081 -0.3919 1.5270

H 2.6239 1.3520 1.4069

C -2.1235 0.7644 -1.1068

H -2.2237 0.4506 -2.1511

H -3.0372 0.4247 -0.6079

H -2.1120 1.8618 -1.0823

H -1.2080 -1.4942 -0.6628

F. Cp*2Mo + CH4 system

1Cp*2Mo LANL2DZ –847.578605

C 0.6612 1.0923 1.7407

C -0.8033 0.9934 1.7285

C -1.1779 -0.3818 2.0017

C 0.0659 -1.1222 2.1376

C 1.2050 -0.2212 2.0135

Mo 0.0321 -0.3188 0.0000

C 0.6612 1.0923 -1.7407

C 1.2050 -0.2212 -2.0135

C 0.0659 -1.1222 -2.1376

C -1.1779 -0.3818 -2.0017

C -0.8033 0.9934 -1.7285

C -1.7580 2.1589 -1.7158

C 1.4596 2.3694 -1.7299

C 2.6467 -0.5469 -2.3108

C 0.1784 -2.6105 -2.3640

C -2.5712 -0.8790 -2.2939

C -1.7580 2.1589 1.7158

C 1.4596 2.3694 1.7299

C 2.6467 -0.5469 2.3108

C 0.1784 -2.6105 2.3640

C -2.5712 -0.8790 2.2939

H -1.9828 2.4813 -2.7443

H -2.7106 1.8996 -1.2390

H -1.3449 3.0247 -1.1868

H 1.5977 2.7461 -2.7554

H 0.9660 3.1623 -1.1570

H 2.4565 2.2184 -1.2985

H 2.8909 -0.3563 -3.3692

H 3.3307 0.0568 -1.7014

H 2.8726 -1.6016 -2.1106

H 0.4094 -2.8287 -3.4176

H 0.9851 -3.0583 -1.7643

H -0.7535 -3.1317 -2.1169

H -2.8374 -0.7233 -3.3525

H -2.6729 -1.9512 -2.0880

H -3.3201 -0.3568 -1.6863

H -2.7106 1.8996 1.2390

H -1.9828 2.4813 2.7443

H -1.3449 3.0247 1.1868

H 1.5977 2.7461 2.7554

H 2.4565 2.2184 1.2985

H 0.9660 3.1623 1.1570

H 2.8909 -0.3563 3.3692

H 2.8726 -1.6016 2.1106

H 3.3307 0.0568 1.7014

H 0.4094 -2.8287 3.4176

H -0.7535 -3.1317 2.1169

H 0.9851 -3.0583 1.7643

H -2.8374 -0.7233 3.3525

H -3.3201 -0.3568 1.6863

H -2.6729 -1.9512 2.0880

1Cp*2Mo 6-31G** -847.744985

C 1.7097 0.7081 1.0528

C 1.7245 -0.7465 1.0252

C 1.9985 -1.1711 -0.3184

C 2.1202 0.0317 -1.1090

C 1.9777 1.1962 -0.2741

Mo -0.0002 -0.0099 -0.3200

C -1.9962 -1.1757 -0.3089

C -1.7239 -0.7380 1.0309

C -1.7118 0.7169 1.0454

C -1.9789 1.1923 -0.2862

C -2.1191 0.0196 -1.1105

C -1.7205 -1.6265 2.2408

C -1.7034 1.5783 2.2749

C -2.2456 2.6157 -0.6849

C -2.3120 0.0302 -2.6029

C -2.2810 -2.5856 -0.7432

C 1.7221 -1.6465 2.2265

C 2.2861 -2.5767 -0.7649

C 2.3142 0.0561 -2.6011

C 2.2427 2.6233 -0.6605

C 1.6983 1.5578 2.2906

H 2.7243 1.7484 2.6343

H 1.2283 2.5291 2.1136

H 1.1661 1.0779 3.1154

H 2.7489 -1.8360 2.5687

H 1.1771 -1.2103 3.0673

H 1.2675 -2.6164 2.0053

H 3.3408 -2.8453 -0.6028

H 1.6756 -3.3029 -0.2205

H 2.0796 -2.7125 -1.8307

H 3.3774 -0.0257 -2.8633

H 1.8015 -0.7797 -3.0916

H 1.9412 0.9854 -3.0428

H 3.2989 2.8943 -0.5133

H 2.0046 2.8080 -1.7122

H 1.6405 3.3168 -0.0666

H -1.2243 2.5442 2.0925

H -2.7305 1.7803 2.6085

H -1.1819 1.1020 3.1085

H -2.7475 -1.8167 2.5822

H -1.2615 -2.5966 2.0305

H -1.1796 -1.1796 3.0788

H -3.3350 -2.8552 -0.5781

H -2.0749 -2.7297 -1.8080

H -1.6686 -3.3061 -0.1934

H -3.3749 -0.0576 -2.8649

H -1.9425 0.9571 -3.0525

H -1.7962 -0.8080 -3.0860

H -3.3018 2.8875 -0.5387

H -1.6429 3.3145 -0.0978

H -2.0089 2.7917 -1.7384

3Cp*2Mo LANL2DZ -847.617578

C -1.9986 1.2101 0.2570

C -2.1244 0.6118 -1.0544

C -2.1114 -0.8206 -0.9046

C -1.9804 -1.1311 0.5048

C -1.9144 0.1312 1.2350

Mo 0.0000 -0.0015 -0.0416

C 1.9141 0.1278 1.2355

C 1.9796 -1.1329 0.5025

C 2.1109 -0.8194 -0.9063

C 2.1250 0.6133 -1.0529

C 1.9993 1.2087 0.2598

C -2.2901 -1.8263 -2.0152

C -2.0955 -2.5031 1.1234

C -1.9898 0.2909 2.7345

C -2.1186 2.6806 0.5746

C -2.3055 1.3633 -2.3506

C 2.1197 2.6785 0.5806

C 2.3068 1.3675 -2.3473

C 2.2891 -1.8228 -2.0191

C 2.0943 -2.5064 1.1181

C 1.9896 0.2842 2.7353

H -3.3571 -2.0365 -2.1867

H -1.8718 -1.4654 -2.9627

H -1.8043 -2.7808 -1.7800

H -3.1481 -2.7632 1.3168

H -1.6810 -3.2809 0.4705

H -1.5645 -2.5603 2.0813

H -3.0356 0.3115 3.0796

H -1.4899 -0.5335 3.2581

H -1.5180 1.2239 3.0666

H -3.1718 2.9712 0.7132

H -1.5857 2.9400 1.4975

H -1.7097 3.3053 -0.2290

H -3.3726 1.5388 -2.5564

H -1.8139 2.3432 -2.3235

H -1.8965 0.8095 -3.2043

H 3.0354 0.3040 3.0804

H 1.5179 1.2165 3.0695

H 1.4897 -0.5413 3.2571

H 3.1468 -2.7671 1.3111

H 1.5631 -2.5655 2.0757

H 1.6798 -3.2827 0.4633

H 3.3560 -2.0334 -2.1908

H 1.8027 -2.7776 -1.7860

H 1.8712 -1.4596 -2.9658

H 3.3741 1.5426 -2.5526

H 1.8974 0.8161 -3.2023

H 1.8160 2.3478 -2.3180

H 3.1730 2.9685 0.7198

H 1.7109 3.3051 -0.2215

H 1.5870 2.9359 1.5041

3Cp*2Mo 6-31G** -847.781330

C -1.9842 1.1966 0.2681

C -2.1055 0.6181 -1.0390

C -2.0936 -0.8036 -0.9056

C -1.9683 -1.1259 0.4887

C -1.9040 0.1169 1.2257

Mo 0.0001 -0.0016 -0.0408

C 1.9038 0.1130 1.2262

C 1.9674 -1.1280 0.4859

C 2.0931 -0.8021 -0.9076

C 2.1061 0.6199 -1.0372

C 1.9849 1.1951 0.2713

C -2.2609 -1.7946 -2.0241

C -2.0756 -2.5008 1.0901

C -1.9783 0.2597 2.7222

C -2.0940 2.6597 0.5995

C -2.2809 1.3814 -2.3228

C 2.0950 2.6573 0.6065

C 2.2821 1.3865 -2.3190

C 2.2598 -1.7905 -2.0286

C 2.0744 -2.5044 1.0837

C 1.9782 0.2520 2.7230

H -3.3222 -2.0133 -2.2041

H -1.8414 -1.4213 -2.9628

H -1.7686 -2.7451 -1.7986

H -3.1223 -2.7669 1.2937

H -1.6681 -3.2674 0.4246

H -1.5336 -2.5699 2.0377

H -3.0204 0.2750 3.0712

H -1.4765 -0.5663 3.2352

H -1.5081 1.1869 3.0631

H -3.1409 2.9579 0.7505

H -1.5518 2.9073 1.5168

H -1.6880 3.2872 -0.1993

H -3.3431 1.5754 -2.5247

H -1.7755 2.3510 -2.2895

H -1.8834 0.8315 -3.1806

H 3.0202 0.2662 3.0721

H 1.5081 1.1784 3.0663

H 1.4763 -0.5752 3.2338

H 3.1209 -2.7714 1.2869

H 1.5321 -2.5759 2.0311

H 1.6668 -3.2693 0.4162

H 3.3211 -2.0094 -2.2090

H 1.7669 -2.7411 -1.8053

H 1.8406 -1.4146 -2.9664

H 3.3445 1.5800 -2.5205

H 1.8841 0.8391 -3.1783

H 1.7776 2.3565 -2.2832

H 3.1419 2.9550 0.7581

H 1.6889 3.2869 -0.1906

H 1.5529 2.9025 1.5245

1Cp*2Mo..H--CH3 eta-2 LANL2DZ

-888.089610

C -1.6341 1.4312 0.0466

C -1.8433 0.6563 -1.1697

C -2.1824 -0.6803 -0.7695

C -2.1914 -0.7304 0.7055

C -1.8583 0.5732 1.2031

Mo 0.0000 -0.2606 -0.0095

C 2.1817 -0.6790 -0.7721

C 1.8419 0.6583 -1.1699

C 1.6339 1.4314 0.0477

C 1.8595 0.5717 1.2027

C 2.1923 -0.7310 0.7028

C 1.9179 1.2138 -2.5679

C 1.6035 2.9365 0.1049

C 1.9435 1.0238 2.6371

C 2.6959 -1.8748 1.5480

C 2.6880 -1.7526 -1.7038

C -1.9212 1.2099 -2.5684

C -2.6894 -1.7553 -1.6993

C -2.6936 -1.8731 1.5530

C -1.9407 1.0272 2.6370

C -1.6039 2.9364 0.1012

H -2.6365 3.3199 0.1116

H -1.1118 3.3150 1.0030

H -1.1061 3.3793 -0.7674

H -2.9373 1.5723 -2.7947

H -1.2355 2.0531 -2.7119

H -1.6681 0.4487 -3.3154

H -3.7600 -1.6087 -1.9142

H -2.1562 -1.7468 -2.6578

H -2.5858 -2.7586 -1.2723

H -3.7713 -1.7611 1.7526

H -2.5584 -2.8448 1.0670

H -2.1831 -1.9131 2.5234

H -2.9521 1.3912 2.8811

H -1.7069 0.2106 3.3296

H -1.2411 1.8452 2.8451

H 1.1116 3.3133 1.0076

H 2.6359 3.3201 0.1156

H 1.1052 3.3808 -0.7627

H 2.9340 1.5754 -2.7956

H 1.6625 0.4541 -3.3156

H 1.2329 2.0581 -2.7089

H 3.7595 -1.6081 -1.9161

H 2.5809 -2.7569 -1.2801

H 2.1568 -1.7399 -2.6633

H 3.7740 -1.7633 1.7455

H 2.1873 -1.9158 2.5194

H 2.5595 -2.8459 1.0612

H 2.9546 1.3892 2.8801

H 1.2428 1.8403 2.8476

H 1.7123 0.2058 3.3289

C 0.0001 -3.2418 -0.0060

H 0.0005 -2.9731 1.0516

H -0.0001 -2.3530 -0.6907

H 0.8944 -3.8242 -0.2411

H -0.8944 -3.8241 -0.2404

Cp*2Mo(eta-CH4) 6-31G**

-888.263613

C -1.6166 1.4165 0.0611

C -1.8246 0.6628 -1.1544

C -2.1686 -0.6645 -0.7712

C -2.1792 -0.7307 0.6889

C -1.8396 0.5527 1.1988

Mo 0.0000 -0.2605 -0.0131

C 2.1677 -0.6626 -0.7747

C 1.8228 0.6654 -1.1547

C 1.6163 1.4166 0.0627

C 1.8413 0.5507 1.1983

C 2.1806 -0.7315 0.6852

C 1.9026 1.2350 -2.5415

C 1.5899 2.9162 0.1381

C 1.9260 0.9810 2.6339

C 2.6842 -1.8798 1.5152

C 2.6682 -1.7214 -1.7181

C -1.9070 1.2295 -2.5422

C -2.6702 -1.7251 -1.7120

C -2.6812 -1.8773 1.5221

C -1.9221 0.9856 2.6338

C -1.5906 2.9162 0.1329

H -2.6220 3.2951 0.1464

H -1.1027 3.2863 1.0373

H -1.0952 3.3709 -0.7276

H -2.9233 1.5853 -2.7668

H -1.2307 2.0783 -2.6762

H -1.6464 0.4818 -3.2960

H -3.7411 -1.5867 -1.9187

H -2.1429 -1.6966 -2.6700

H -2.5562 -2.7321 -1.3037

H -3.7559 -1.7667 1.7248

H -2.5500 -2.8422 1.0275

H -2.1699 -1.9290 2.4884

H -2.9330 1.3363 2.8882

H -1.6777 0.1642 3.3126

H -1.2311 1.8048 2.8510

H 1.1013 3.2838 1.0432

H 2.6212 3.2953 0.1532

H 1.0949 3.3729 -0.7214

H 2.9185 1.5909 -2.7675

H 1.6402 0.4887 -3.2962

H 1.2262 2.0842 -2.6724

H 3.7398 -1.5853 -1.9225

H 2.5506 -2.7296 -1.3136

H 2.1426 -1.6882 -2.6770

H 3.7599 -1.7709 1.7136

H 2.1767 -1.9317 2.4834

H 2.5494 -2.8439 1.0201

H 2.9368 1.3331 2.8869

H 1.2339 1.7985 2.8541

H 1.6846 0.1580 3.3118

C 0.0001 -3.1965 -0.0160

H 0.0006 -2.9599 1.0457

H 0.0004 -2.2967 -0.6889

H 0.8912 -3.7704 -0.2692

H -0.8917 -3.7696 -0.2686

1Cp*2Mo(H)(CH3) LANL2DZ

-888.111712

C -1.9252 0.1954 1.2860

C -1.6530 1.3322 0.4209

C -1.8431 0.9238 -0.9542

C -2.2375 -0.4792 -0.9222

C -2.3325 -0.8946 0.4648

Mo -0.0009 -0.2742 -0.1953

C 1.9242 0.2070 1.2860

C 2.3136 -0.9091 0.4916

C 2.2333 -0.5217 -0.9052

C 1.8620 0.8868 -0.9690

C 1.6748 1.3283 0.3949

C -0.0169 -2.5215 -0.1129

C 1.6200 2.7676 0.8372

C 1.9389 0.2671 2.7922

C 2.8513 -2.2079 1.0293

C 2.7283 -1.3473 -2.0650

C 1.9434 1.7634 -2.1920

C -1.5827 2.7596 0.8988

C -1.9498 0.2205 2.7931

C -2.8965 -2.1950 0.9712

C -2.7346 -1.2754 -2.1015

C -1.9069 1.8290 -2.1576

H 0.8534 -2.9331 -0.6350

H -0.0125 -2.8912 0.9251

H -0.8991 -2.9218 -0.6236

H -0.0043 -0.7499 -1.7974

H 2.6469 3.1494 0.9467

H 1.1148 3.4111 0.1104

H 1.1240 2.8949 1.8045

H 2.9186 0.6076 3.1623

H 1.1875 0.9637 3.1833

H 1.7444 -0.7161 3.2360

H 3.8735 -2.0588 1.4086

H 2.2459 -2.5958 1.8569

H 2.8953 -2.9833 0.2598

H 3.8291 -1.3597 -2.0931

H 2.3883 -2.3878 -2.0058

H 2.3726 -0.9427 -3.0181

H 2.9748 2.1100 -2.3663

H 1.6167 1.2253 -3.0888

H 1.3103 2.6529 -2.0959

H -1.0661 3.4150 0.1914

H -2.6055 3.1510 1.0135

H -1.0902 2.8561 1.8719

H -2.9212 0.5826 3.1647

H -1.7891 -0.7789 3.2136

H -1.1799 0.8829 3.2067

H -3.8819 -2.0197 1.4281

H -3.0308 -2.9221 0.1657

H -2.2574 -2.6579 1.7324

H -3.8354 -1.2790 -2.1341

H -2.3724 -0.8527 -3.0442

H -2.4014 -2.3191 -2.0635

H -2.9316 2.1979 -2.3255

H -1.2581 2.7047 -2.0405

H -1.5884 1.3056 -3.0661

1Cp*2Mo(H)(CH3) 6-31G**

-888.284767

C -1.9033 0.1987 1.2765

C -1.6491 1.3251 0.4127

C -1.8396 0.9141 -0.9479

C -2.2197 -0.4791 -0.9108

C -2.2996 -0.8895 0.4663

Mo -0.0007 -0.2682 -0.1928

C 1.9019 0.2100 1.2770

C 2.2832 -0.9018 0.4918

C 2.2166 -0.5176 -0.8942

C 1.8570 0.8802 -0.9609

C 1.6681 1.3216 0.3893

C -0.0153 -2.5284 -0.1397

C 1.6112 2.7581 0.8245

C 1.9096 0.2702 2.7781

C 2.8096 -2.1963 1.0375

C 2.7116 -1.3428 -2.0481

C 1.9442 1.7511 -2.1819

C -1.5788 2.7506 0.8811

C -1.9209 0.2273 2.7785

C -2.8517 -2.1854 0.9825

C -2.7153 -1.2775 -2.0833

C -1.9101 1.8111 -2.1513

H 0.8526 -2.9372 -0.6591

H -0.0207 -2.9289 0.8821

H -0.8842 -2.9276 -0.6652

H -0.0030 -0.7331 -1.7918

H 2.6348 3.1420 0.9325

H 1.1064 3.3966 0.0969

H 1.1166 2.8886 1.7891

H 2.8983 0.5652 3.1561

H 1.1898 0.9984 3.1626

H 1.6670 -0.7000 3.2202

H 3.8502 -2.0651 1.3625

H 2.2355 -2.5403 1.9023

H 2.7971 -2.9932 0.2929

H 3.8087 -1.3177 -2.1006

H 2.4109 -2.3903 -1.9626

H 2.3218 -0.9682 -2.9972

H 2.9715 2.1067 -2.3469

H 1.6319 1.2087 -3.0778

H 1.3037 2.6330 -2.0963

H -1.0675 3.4016 0.1696

H -2.5988 3.1414 0.9981

H -1.0839 2.8534 1.8492

H -2.9056 0.5361 3.1560

H -1.7030 -0.7574 3.2009

H -1.1877 0.9303 3.1841

H -3.8782 -2.0320 1.3407

H -2.8858 -2.9548 0.2100

H -2.2665 -2.5785 1.8184

H -3.8122 -1.2472 -2.1382

H -2.3216 -0.8842 -3.0232

H -2.4177 -2.3275 -2.0192

H -2.9312 2.1860 -2.3118

H -1.2561 2.6810 -2.0460

H -1.6037 1.2822 -3.0573

G. Cp*2W + CH4 system

1Cp*2W LANL2DZ -847.842108

C 1.0806 0.7135 1.7961

C -0.2671 1.2905 1.6617

C -1.2573 0.2244 1.8599

C -0.5154 -1.0036 2.0999

C 0.9219 -0.7066 2.0683

W 0.0179 -0.2462 0.0000

C 1.0806 0.7135 -1.7961

C 0.9219 -0.7066 -2.0683

C -0.5154 -1.0036 -2.0999

C -1.2573 0.2244 -1.8599

C -0.2671 1.2905 -1.6617

C -0.5824 2.7628 -1.6691

C 2.3668 1.4918 -1.8884

C 2.0299 -1.6688 -2.4218

C -1.1181 -2.3499 -2.4219

C -2.7443 0.4187 -2.0079

C -0.5824 2.7628 1.6691

C 2.3668 1.4918 1.8884

C 2.0299 -1.6688 2.4218

C -1.1181 -2.3499 2.4219

C -2.7443 0.4187 2.0079

H -0.6503 3.1288 -2.7053

H -1.5400 2.9809 -1.1828

H 0.1904 3.3542 -1.1651

H 2.5684 1.8003 -2.9264

H 2.3376 2.4016 -1.2769

H 3.2225 0.8952 -1.5497

H 2.1816 -1.7123 -3.5125

H 2.9829 -1.3705 -1.9684

H 1.8125 -2.6909 -2.0854

H -1.2286 -2.4806 -3.5102

H -0.4932 -3.1774 -2.0610

H -2.1131 -2.4674 -1.9750

H -3.0092 0.7061 -3.0382

H -3.2954 -0.4991 -1.7703

H -3.1166 1.2060 -1.3407

H -1.5400 2.9809 1.1828

H -0.6503 3.1288 2.7053

H 0.1904 3.3542 1.1651

H 2.5684 1.8003 2.9264

H 3.2225 0.8952 1.5497

H 2.3376 2.4016 1.2769

H 2.1816 -1.7123 3.5125

H 1.8125 -2.6909 2.0854

H 2.9829 -1.3705 1.9684

H -1.2286 -2.4806 3.5102

H -2.1131 -2.4674 1.9750

H -0.4932 -3.1774 2.0610

H -3.0092 0.7061 3.0382

H -3.1166 1.2060 1.3407

H -3.2954 -0.4991 1.7703

1Cp*2W LACVP -847.784833

C -0.0723 1.3033 1.7941

C -1.2633 0.4577 1.6595

C -0.8696 -0.9389 1.8540

C 0.5575 -0.9450 2.1027

C 1.0525 0.4298 2.0653

W 0.1960 -0.0994 0.0000

C -0.0723 1.3033 -1.7941

C 1.0525 0.4298 -2.0653

C 0.5575 -0.9450 -2.1027

C -0.8696 -0.9389 -1.8540

C -1.2633 0.4577 -1.6595

C -2.6796 0.9546 -1.6639

C -0.0671 2.8026 -1.8831

C 2.4486 0.8675 -2.4146

C 1.3882 -2.1596 -2.4191

C -1.8077 -2.1043 -1.9909

C -2.6796 0.9546 1.6639

C -0.0671 2.8026 1.8831

C 2.4486 0.8675 2.4146

C 1.3882 -2.1596 2.4191

C -1.8077 -2.1043 1.9909

H -3.0324 1.0915 -2.6968

H -3.3616 0.2501 -1.1777

H -2.7798 1.9181 -1.1553

H -0.2252 3.1416 -2.9181

H -0.8578 3.2457 -1.2686

H 0.8850 3.2213 -1.5398

H 2.5764 0.9620 -3.5042

H 2.6849 1.8401 -1.9701

H 3.2025 0.1546 -2.0612

H 1.4452 -2.3293 -3.5051

H 2.4175 -2.0572 -2.0553

H 0.9676 -3.0645 -1.9673

H -2.2061 -2.1858 -3.0140

H -1.3058 -3.0495 -1.7582

H -2.6628 -2.0152 -1.3119

H -3.3616 0.2501 1.1777

H -3.0324 1.0915 2.6968

H -2.7798 1.9181 1.1553

H -0.2252 3.1416 2.9181

H 0.8850 3.2213 1.5398

H -0.8578 3.2457 1.2686

H 2.5764 0.9620 3.5042

H 3.2025 0.1546 2.0612

H 2.6849 1.8401 1.9701

H 1.4452 -2.3293 3.5051

H 0.9676 -3.0645 1.9673

H 2.4175 -2.0572 2.0553

H -2.2061 -2.1858 3.0140

H -2.6628 -2.0152 1.3119

H -1.3058 -3.0495 1.7582

1Cp*2W 6-31G** -848.011688

C -1.6898 -0.7165 1.0870

C -1.6939 0.7438 1.0667

C -1.9577 1.1791 -0.2879

C -2.0984 -0.0197 -1.0862

C -1.9502 -1.1932 -0.2549

W 0.0001 -0.0007 -0.2462

C 2.0981 -0.0054 -1.0866

C 1.9531 -1.1877 -0.2669

C 1.6915 -0.7253 1.0799

C 1.6919 0.7352 1.0741

C 1.9545 1.1851 -0.2764

C 1.7124 1.6177 2.2884

C 1.7152 -1.5946 2.3034

C 2.2491 -2.6041 -0.6709

C 2.3275 -0.0097 -2.5748

C 2.2494 2.5984 -0.6945

C 1.7166 1.6389 2.2717

C -2.2570 2.5874 -0.7193

C -2.3274 -0.0398 -2.5745

C -2.2421 -2.6143 -0.6453

C -1.7108 -1.5736 2.3192

H -2.7438 -1.7506 2.6486

H -1.2505 -2.5497 2.1427

H -1.1815 -1.1052 3.1526

H -2.7502 1.8271 2.5933

H -1.1885 1.1988 3.1214

H -1.2560 2.6086 2.0632

H -3.3165 2.8393 -0.5640

H -1.6603 3.3125 -0.1590

H -2.0406 2.7401 -1.7809

H -3.4001 -0.0222 -2.8104

H -1.8772 0.8292 -3.0666

H -1.9098 -0.9397 -3.0382

H -3.3016 -2.8664 -0.4886

H -2.0184 -2.7972 -1.7005

H -1.6452 -3.3195 -0.0604

H 1.2570 -2.5699 2.1169

H 2.7488 -1.7728 2.6302

H 1.1855 -1.1362 3.1420

H 2.7454 1.8030 2.6136

H 1.2516 2.5894 2.0900

H 1.1834 1.1681 3.1326

H 3.3085 2.8516 -0.5387

H 2.0305 2.7607 -1.7541

H 1.6522 3.3168 -0.1263

H 3.4003 0.0092 -2.8101

H 1.9092 -0.9042 -3.0484

H 1.8783 0.8650 -3.0573

H 3.3087 -2.8553 -0.5136

H 1.6520 -3.3161 -0.0947

H 2.0291 -2.7771 -1.7285

3Cp*2W LANL2DZ -847.878730

C -1.9594 1.2101 0.2832

C -2.0989 0.6323 -1.0397

C -2.0846 -0.8038 -0.9172

C -1.9394 -1.1453 0.4878

C -1.8681 0.1088 1.2470

W 0.0000 -0.0006 -0.0338

C 1.8681 0.1056 1.2472

C 1.9387 -1.1471 0.4854

C 2.0839 -0.8028 -0.9190

C 2.0994 0.6336 -1.0384

C 1.9603 1.2087 0.2856

C -2.2756 -1.7878 -2.0446

C -2.0763 -2.5262 1.0808

C -1.9709 0.2393 2.7475

C -2.0991 2.6720 0.6293

C -2.2918 1.4072 -2.3198

C 2.1003 2.6699 0.6347

C 2.2928 1.4110 -2.3169

C 2.2744 -1.7846 -2.0483

C 2.0751 -2.5292 1.0757

C 1.9711 0.2329 2.7480

H -3.3450 -1.9922 -2.2080

H -1.8653 -1.4099 -2.9887

H -1.7885 -2.7465 -1.8311

H -3.1323 -2.7703 1.2762

H -1.6789 -3.2977 0.4101

H -1.5392 -2.6106 2.0331

H -3.0225 0.2500 3.0745

H -1.4758 -0.5934 3.2623

H -1.5065 1.1666 3.1048

H -3.1555 2.9434 0.7816

H -1.5614 2.9207 1.5521

H -1.7044 3.3167 -0.1653

H -3.3611 1.5866 -2.5100

H -1.7983 2.3854 -2.2787

H -1.8911 0.8687 -3.1867

H 3.0228 0.2428 3.0749

H 1.5068 1.1596 3.1073

H 1.4761 -0.6009 3.2610

H 3.1311 -2.7740 1.2706

H 1.5380 -2.6153 2.0279

H 1.6774 -3.2992 0.4036

H 3.3436 -1.9895 -2.2120

H 1.7866 -2.7434 -1.8367

H 1.8644 -1.4046 -2.9917

H 3.3622 1.5899 -2.5068

H 1.8916 0.8746 -3.1849

H 1.8001 2.3895 -2.2737

H 3.1568 2.9407 0.7874

H 1.7055 3.3163 -0.1585

H 1.5628 2.9167 1.5581

3Cp*2W LACVP -847.820815

C -1.1781 1.9476 -0.3897

C -0.7182 2.0893 0.9748

C 0.7182 2.0893 0.9748

C 1.1781 1.9476 -0.3897

C 0.0000 1.8673 -1.2518

W 0.0000 0.0000 0.0295

C 0.0000 -1.8673 -1.2518

C 1.1781 -1.9476 -0.3897

C 0.7182 -2.0893 0.9748

C -0.7182 -2.0893 0.9748

C -1.1781 -1.9476 -0.3897

C 1.5976 2.2788 2.1781

C 2.5994 2.0834 -0.8587

C 0.0000 1.9724 -2.7512

C -2.5994 2.0834 -0.8587

C -1.5976 2.2788 2.1781

C -2.5994 -2.0834 -0.8587

C -1.5976 -2.2788 2.1781

C 1.5976 -2.2788 2.1781

C 2.5994 -2.0834 -0.8587

C 0.0000 -1.9724 -2.7512

H 1.7972 3.3459 2.3556

H 1.1348 1.8754 3.0849

H 2.5646 1.7812 2.0501

H 2.8608 3.1371 -1.0386

H 3.3067 1.6889 -0.1212

H 2.7649 1.5398 -1.7949

H 0.0000 3.0230 -3.0790

H 0.8824 1.4914 -3.1869

H -0.8824 1.4914 -3.1869

H -2.8608 3.1371 -1.0386

H -2.7649 1.5398 -1.7949

H -3.3067 1.6889 -0.1212

H -1.7972 3.3459 2.3556

H -2.5646 1.7812 2.0501

H -1.1348 1.8754 3.0849

H 0.0000 -3.0230 -3.0790

H -0.8824 -1.4914 -3.1869

H 0.8824 -1.4914 -3.1869

H 2.8608 -3.1371 -1.0386

H 2.7649 -1.5398 -1.7949

H 3.3067 -1.6889 -0.1212

H 1.7972 -3.3459 2.3556

H 2.5646 -1.7812 2.0501

H 1.1348 -1.8754 3.0849

H -1.7972 -3.3459 2.3556

H -1.1348 -1.8754 3.0849

H -2.5646 -1.7812 2.0501

H -2.8608 -3.1371 -1.0386

H -3.3067 -1.6889 -0.1212

H -2.7649 -1.5398 -1.7949

3Cp*2W 6-31G** -848.045154

C -1.9423 1.1924 0.3088

C -2.0762 0.6507 -1.0165

C -2.0648 -0.7757 -0.9271

C -1.9279 -1.1447 0.4583

C 1.8574 0.0795 1.2382

W 0.0001 -0.0008 -0.0340

C 1.8574 0.0763 1.2384

C 1.9272 -1.1464 0.4557

C 2.0642 -0.7743 -0.9289

C 2.0765 0.6524 -1.0151

C 1.9430 1.1912 0.3113

C -2.2383 -1.7323 -2.0739

C -2.0502 -2.5355 1.0183

C -1.9605 0.1753 2.7368

C -2.0640 2.6431 0.6865

C -2.2624 1.4538 -2.2739

C 2.0647 2.6409 0.6923

C 2.2629 1.4581 -2.2708

C 2.2373 -1.7285 -2.0778

C 2.0493 -2.5384 1.0126

C 1.9607 0.1687 2.7371

H -3.3010 -1.9468 -2.2514

H -1.8254 -1.3299 -3.0033

H -1.7420 -2.6875 -1.8797

H -3.0986 -2.7920 1.2255

H -1.6602 -3.2856 0.3242

H -1.4975 -2.6413 1.9564

H -3.0093 0.1786 3.0658

H -1.4665 -0.6661 3.2321

H -1.4974 1.0915 3.1151

H -3.1118 2.9243 0.8620

H -1.5093 2.8678 1.6023

H -1.6753 3.2976 -0.0989

H -3.3259 1.6654 -2.4498

H -1.7444 2.4158 -2.2205

H -1.8861 0.9246 -3.1538

H 3.0095 0.1711 3.0660

H 1.4979 1.0842 3.1175

H 1.4667 -0.6737 3.2306

H 3.0976 -2.7955 1.2194

H 1.4965 -2.6462 1.9505

H 1.6592 -3.2869 0.3169

H 3.2999 -1.9433 -2.2557

H 1.7405 -2.6838 -1.8855

H 1.8247 -1.3241 -3.0064

H 3.3265 1.6693 -2.4466

H 1.8859 0.9311 -3.1517

H 1.7456 2.4204 -2.2151

H 3.1125 2.9219 0.8682

H 1.6757 3.2973 -0.0915

H 1.5102 2.8634 1.6087

1Cp*2W + CH4 addition TS

LACVP -888.291397

W 0.0152 0.1950 0.0019

C 0.0394 3.6375 0.0005

H -1.0460 3.5347 0.0056

H 0.3675 4.1701 0.8955

H 0.3546 4.1874 -0.8893

H 0.5280 2.6442 -0.0177

C -0.7088 0.7270 -2.1325

C 0.7564 0.6805 -2.1408

C 0.7549 0.6775 2.1430

C -0.7105 0.7261 2.1362

C 1.1720 -0.6602 -1.8013

C -0.0442 -1.4461 -1.5902

C -1.2090 -0.5827 -1.7904

C 1.1687 -0.6637 1.8031

C -1.2128 -0.5826 1.7932

C -0.0490 -1.4476 1.5914

C -0.0996 -2.9481 1.5947

C 2.5624 -1.2106 1.9184

C 1.6781 1.7589 2.6337

C -1.5633 1.8758 2.5985

C -2.6414 -1.0329 1.8963

C -0.0930 -2.9466 -1.5949

C 2.5660 -1.2068 -1.9146

C 1.6763 1.7625 -2.6358

C -1.5630 1.8749 -2.5973

C -2.6370 -1.0351 -1.8935

H -0.1141 -3.3131 2.6327

H -0.9959 -3.3360 1.1027

H 0.7709 -3.3952 1.1067

H 2.7756 -1.5571 2.9417

H 2.7190 -2.0605 1.2456

H 3.3086 -0.4511 1.6632

H 1.8943 1.6310 3.7056

H 2.6347 1.7467 2.0996

H 1.2453 2.7556 2.5103

H -1.8152 1.7702 3.6649

H -1.0563 2.8378 2.4816

H -2.5062 1.9300 2.0422

H -2.8869 -1.3593 2.9189

H -3.3324 -0.2258 1.6315

H -2.8492 -1.8733 1.2256

H -0.9888 -3.3359 -1.1032

H -0.1073 -3.3107 -2.6331

H 0.7780 -3.3934 -1.1073

H 2.7800 -1.5550 -2.9372

H 3.3122 -0.4472 -1.6599

H 2.7220 -2.0555 -1.2403

H 1.8567 1.6565 -3.7167

H 1.2627 2.7625 -2.4764

H 2.6490 1.7252 -2.1329

H -1.8131 1.7677 -3.6641

H -2.5069 1.9280 -2.0427

H -1.0577 2.8378 -2.4809

H -2.8829 -1.3600 -2.9165

H -2.8429 -1.8771 -1.2242

H -3.3292 -0.2297 -1.6265

1Cp*2W...CH4 eta-2 LACVP

-888.292706

W -0.0636 -0.2067 0.0000

C -0.9413 -0.3370 2.1699

C 0.4203 -0.8874 2.1767

C 0.4203 -0.8874 -2.1767

C -0.9413 -0.3370 -2.1699

C 1.3412 0.1607 1.8219

C 0.5486 1.3618 1.6020

C -0.8617 1.0490 1.8019

C 1.3412 0.1607 -1.8219

C -0.8617 1.0490 -1.8019

C 0.5486 1.3618 -1.6020

C 1.1136 2.7533 -1.5852

C 2.8368 0.0959 -1.9386

C 0.8311 -2.2314 -2.7123

C -2.1830 -1.0141 -2.6797

C -1.9834 2.0445 -1.8764

C 1.1136 2.7533 1.5852

C 2.8368 0.0959 1.9386

C 0.8311 -2.2314 2.7123

C -2.1830 -1.0141 2.6797

C -1.9834 2.0445 1.8764

H 1.2563 3.1012 -2.6194

H 0.4504 3.4696 -1.0930

H 2.0879 2.8031 -1.0915

H 3.1709 0.3309 -2.9615

H 3.3236 0.8068 -1.2628

H 3.2102 -0.9017 -1.6865

H 1.0774 -2.1643 -3.7829

H 1.7135 -2.6193 -2.1913

H 0.0370 -2.9780 -2.6165

H -2.3511 -0.7752 -3.7409

H -2.1260 -2.1039 -2.6014

H -3.0728 -0.6926 -2.1255

H -2.0848 2.4570 -2.8923

H -2.9399 1.5855 -1.6065

H -1.8217 2.8870 -1.1963

H 0.4504 3.4696 1.0930

H 1.2563 3.1012 2.6194

H 2.0879 2.8031 1.0915

H 3.1709 0.3309 2.9615

H 3.2102 -0.9017 1.6865

H 3.3236 0.8068 1.2628

H 1.0774 -2.1643 3.7829

H 0.0370 -2.9780 2.6165

H 1.7135 -2.6193 2.1913

H -2.3511 -0.7752 3.7409

H -3.0728 -0.6926 2.1255

H -2.1260 -2.1039 2.6014

H -2.0848 2.4570 2.8923

H -1.8217 2.8870 1.1963

H -2.9399 1.5855 1.6065

C -1.2029 -2.7611 0.0000

H -2.0808 -2.1193 0.0000

H -1.1991 -3.3841 -0.8940

H -1.1991 -3.3841 0.8940

H -0.1764 -2.2436 0.0000

1Cp*2W...CH4 eta-2 6-31G**

-888.530468

C -1.5890 1.4436 0.0910

C -1.7792 0.7119 -1.1453

C -2.1434 -0.6260 -0.7868

C -2.1658 -0.7205 0.6690

C -1.8077 0.5515 1.2124

W 0.0000 -0.2245 -0.0158

C 2.1673 -0.7212 0.6649

C 1.8096 0.5494 1.2116

C 1.5886 1.4437 0.0924

C 1.7772 0.7145 -1.1457

C 2.1423 -0.6241 -0.7906

C 1.8803 1.3157 -2.5176

C 1.5805 2.9415 0.2004

C 1.9212 0.9513 2.6536

C 2.6912 -1.8728 1.4775

C 2.6467 -1.6546 -1.7626

C -1.8851 1.3103 -2.5182

C -2.6493 -1.6583 -1.7561

C -2.6879 -1.8706 1.4850

C -1.9166 0.9558 2.6539

C -1.5813 2.9417 0.1953

H -2.6180 3.3052 0.2146

H -1.1002 3.2993 1.1083

H -1.0907 3.4219 -0.6538

H -2.9084 1.6599 -2.7198

H -1.2194 2.1690 -2.6405

H -1.6263 0.5831 -3.2922

H -3.7138 -1.4968 -1.9779

H -2.1028 -1.6222 -2.7031

H -2.5611 -2.6751 -1.3650

H -3.7559 -1.7330 1.7049

H -2.5914 -2.8292 0.9705

H -2.1651 -1.9560 2.4430

H -2.9365 1.2853 2.9007

H -1.6661 0.1255 3.3193

H -1.2412 1.7813 2.8946

H 1.0989 3.2967 1.1141

H 2.6172 3.3053 0.2210

H 1.0902 3.4237 -0.6477

H 2.9032 1.6655 -2.7208

H 1.6196 0.5900 -3.2925

H 1.2144 2.1747 -2.6368

H 3.7117 -1.4950 -1.9831

H 2.5556 -2.6723 -1.3747

H 2.1010 -1.6142 -2.7098

H 3.7602 -1.7368 1.6933

H 2.1722 -1.9585 2.4375

H 2.5914 -2.8307 0.9625

H 2.9412 1.2825 2.8983

H 1.2449 1.7751 2.8973

H 1.6742 0.1196 3.3184

C 0.0001 -3.0510 -0.0117

H 0.0025 -2.8895 1.0617

H -0.0003 -2.1281 -0.6934

H 0.8904 -3.6038 -0.3079

H -0.8922 -3.6025 -0.3041

1/3Cp*2W...CH4 MECP LACVP

-888.291697

W -0.0956 -0.1834 0.0000

C -0.9780 -0.2028 2.1494

C 0.2864 -0.9469 2.1617

C 0.2864 -0.9469 -2.1617

C -0.9780 -0.2028 -2.1494

C 1.3518 -0.0458 1.8004

C 0.7444 1.2635 1.5749

C -0.6996 1.1623 1.7800

C 1.3518 -0.0458 -1.8004

C -0.6996 1.1623 -1.7800

C 0.7444 1.2635 -1.5749

C 1.5078 2.5566 -1.5757

C 2.8216 -0.3247 -1.9287

C 0.4941 -2.3352 -2.7016

C -2.3048 -0.6882 -2.6654

C -1.6597 2.3130 -1.8715

C 1.5078 2.5566 1.5757

C 2.8216 -0.3247 1.9287

C 0.4941 -2.3352 2.7016

C -2.3048 -0.6882 2.6654

C -1.6597 2.3130 1.8715

H 1.6908 2.8655 -2.6153

H 0.9612 3.3696 -1.0903

H 2.4834 2.4707 -1.0896

H 3.1745 -0.1359 -2.9546

H 3.4136 0.3083 -1.2591

H 3.0538 -1.3664 -1.6853

H 0.7457 -2.2955 -3.7723

H 1.3129 -2.8542 -2.1908

H -0.4006 -2.9571 -2.6065

H -2.4205 -0.4232 -3.7275

H -2.4075 -1.7749 -2.5923

H -3.1439 -0.2382 -2.1220

H -1.6912 2.7279 -2.8910

H -2.6769 2.0058 -1.6070

H -1.3791 3.1290 -1.1970

H 0.9612 3.3696 1.0903

H 1.6908 2.8655 2.6153

H 2.4834 2.4707 1.0896

H 3.1745 -0.1359 2.9546

H 3.0538 -1.3664 1.6853

H 3.4136 0.3083 1.2591

H 0.7457 -2.2955 3.7723

H -0.4006 -2.9571 2.6065

H 1.3129 -2.8542 2.1908

H -2.4205 -0.4232 3.7275

H -3.1439 -0.2382 2.1220

H -2.4075 -1.7749 2.5923

H -1.6912 2.7279 2.8910

H -1.3791 3.1290 1.1970

H -2.6769 2.0058 1.6070

C -1.7741 -2.8697 0.0000

H -2.5414 -2.0947 0.0000

H -1.8722 -3.4936 -0.8897

H -1.8722 -3.4936 0.8897

H -0.7419 -2.4453 0.0000

1Cp*2W...H-CH2-H exch. TS

LACVP -888.290323

W 0.0000 0.0000 -0.2131

C 0.7346 2.1708 -0.6638

C -0.7346 2.1708 -0.6638

C -0.7346 -2.1708 -0.6638

C 0.7346 -2.1708 -0.6638

C -1.1878 1.8078 0.6519

C 0.0000 1.5976 1.4699

C 1.1878 1.8078 0.6519

C -1.1878 -1.8078 0.6519

C 1.1878 -1.8078 0.6519

C 0.0000 -1.5976 1.4699

C 0.0000 -1.5825 2.9714

C -2.6007 -1.9006 1.1520

C -1.6241 -2.6923 -1.7584

C 1.6241 -2.6923 -1.7584

C 2.6007 -1.9006 1.1520

C 0.0000 1.5825 2.9714

C -2.6007 1.9006 1.1520

C -1.6241 2.6923 -1.7584

C 1.6241 2.6923 -1.7584

C 2.6007 1.9006 1.1520

H 0.0000 -2.6175 3.3454

H 0.8841 -1.0902 3.3853

H -0.8841 -1.0902 3.3853

H -2.8378 -2.9194 1.4965

H -2.7765 -1.2212 1.9923

H -3.3165 -1.6399 0.3659

H -1.8491 -3.7583 -1.6022

H -2.5786 -2.1545 -1.7931

H -1.1626 -2.6069 -2.7468

H 1.8491 -3.7583 -1.6022

H 1.1626 -2.6069 -2.7468

H 2.5786 -2.1545 -1.7931

H 2.8378 -2.9194 1.4965

H 3.3165 -1.6399 0.3659

H 2.7765 -1.2212 1.9923

H 0.8841 1.0902 3.3853

H 0.0000 2.6175 3.3454

H -0.8841 1.0902 3.3853

H -2.8378 2.9194 1.4965

H -3.3165 1.6399 0.3659

H -2.7765 1.2212 1.9923

H -1.8491 3.7583 -1.6022

H -1.1626 2.6069 -2.7468

H -2.5786 2.1545 -1.7931

H 1.8491 3.7583 -1.6022

H 2.5786 2.1545 -1.7931

H 1.1626 2.6069 -2.7468

H 2.8378 2.9194 1.4965

H 2.7765 1.2212 1.9923

H 3.3165 1.6399 0.3659

C 0.0000 0.0000 -3.0506

H 0.9189 0.0000 -2.4276

H 0.0000 -0.8986 -3.6640

H 0.0000 0.8986 -3.6640

H -0.9189 0.0000 -2.4276

1Cp*2W-H---CH3 ins. TS

LACVP ca. -888.2904

W -0.0924 -0.2139 0.0000

C -1.0341 -0.1991 2.1430

C 0.2408 -0.8959 2.2734

C 1.3014 -0.0086 1.9008

C 0.6869 1.2788 1.6042

C -0.7576 1.1598 1.7443

C 0.2408 -0.8959 -2.2734

C -1.0341 -0.1991 -2.1430

C 1.3014 -0.0086 -1.9008

C -0.7576 1.1598 -1.7443

C 0.6869 1.2788 -1.6042

C 1.4441 2.5766 -1.5865

C 2.7701 -0.2691 -2.0774

C 0.4488 -2.2548 -2.8811

C -2.3777 -0.7049 -2.5908

C -1.7368 2.2996 -1.7761

C 1.4441 2.5766 1.5865

C 2.7701 -0.2691 2.0774

C 0.4488 -2.2548 2.8811

C -2.3777 -0.7049 2.5908

C -1.7368 2.2996 1.7761

H 1.6267 2.9052 -2.6208

H 0.8937 3.3781 -1.0878

H 2.4197 2.4862 -1.1008

H 3.1089 -0.0002 -3.0907

H 3.3695 0.3096 -1.3668

H 3.0053 -1.3264 -1.9189

H 0.9035 -2.1518 -3.8763

H 1.1134 -2.8890 -2.2830

H -0.4955 -2.7902 -3.0127

H -2.5198 -0.5542 -3.6723

H -2.5076 -1.7739 -2.3908

H -3.1849 -0.1778 -2.0721

H -1.8587 2.6879 -2.7991

H -2.7236 1.9928 -1.4154

H -1.4054 3.1339 -1.1503

H 0.8937 3.3781 1.0878

H 1.6267 2.9052 2.6208

H 2.4197 2.4862 1.1008

H 3.1089 -0.0002 3.0907

H 3.0053 -1.3264 1.9189

H 3.3695 0.3096 1.3668

H 0.9035 -2.1518 3.8763

H -0.4955 -2.7902 3.0127

H 1.1134 -2.8890 2.2830

H -2.5198 -0.5542 3.6723

H -3.1849 -0.1778 2.0721

H -2.5076 -1.7739 2.3908

H -1.8587 2.6879 2.7991

H -1.4054 3.1339 1.1503

H -2.7236 1.9928 1.4154

C -0.5997 -2.6717 0.0000

H -1.2978 -1.5233 0.0000

H -1.0664 -3.0976 -0.8889

H -1.0664 -3.0976 0.8889

H 0.4624 -2.9166 0.0000

1Cp*2W(H)(CH3) LANL2DZ

-888.401358

C -1.9009 0.1773 1.3156

C -1.6067 1.3421 0.4877

C -1.8026 0.9817 -0.9092

C -2.2383 -0.4154 -0.9147

C -2.3463 -0.8686 0.4538

W -0.0002 -0.2309 -0.1757

C 1.9031 0.1892 1.3150

C 2.3358 -0.8762 0.4713

C 2.2346 -0.4432 -0.9050

C 1.8136 0.9586 -0.9217

C 1.6206 1.3428 0.4682

C -0.0083 -2.4695 -0.0564

C 1.5910 2.7641 0.9684

C 1.9415 0.1933 2.8217

C 2.9019 -2.1832 0.9550

C 2.7226 -1.2240 -2.0980

C 1.9112 1.8893 -2.1030

C -1.5708 2.7543 1.0136

C -1.9463 0.1562 2.8220

C -2.9282 -2.1760 0.9177

C -2.7294 -1.1747 -2.1203

C -1.8904 1.9331 -2.0748

H 0.8484 -2.8900 -0.5971

H 0.0176 -2.8597 0.9751

H -0.8951 -2.8837 -0.5506

H -0.0041 -0.7144 -1.7910

H 2.6258 3.1240 1.0784

H 1.0877 3.4440 0.2746

H 1.1098 2.8611 1.9465

H 2.9166 0.5499 3.1891

H 1.1759 0.8514 3.2498

H 1.7826 -0.8108 3.2312

H 3.9098 -2.0174 1.3639

H 2.2930 -2.6316 1.7483

H 2.9889 -2.9158 0.1480

H 3.8220 -1.2044 -2.1556

H 2.4109 -2.2744 -2.0568

H 2.3296 -0.8054 -3.0301

H 2.9419 2.2540 -2.2418

H 1.6070 1.3881 -3.0289

H 1.2652 2.7661 -1.9799

H -1.0665 3.4453 0.3318

H -2.6041 3.1155 1.1324

H -1.0878 2.8314 1.9929

H -2.9174 0.5219 3.1914

H -1.8055 -0.8577 3.2138

H -1.1724 0.7939 3.2656

H -3.9028 -1.9949 1.3945

H -3.0896 -2.8691 0.0875

H -2.2888 -2.6789 1.6523

H -3.8284 -1.1447 -2.1807

H -2.3300 -0.7462 -3.0451

H -2.4262 -2.2281 -2.0930

H -2.9167 2.3125 -2.2064

H -1.2338 2.8000 -1.9376

H -1.5931 1.4444 -3.0096

1Cp*2W(H)(CH3) LACVP

-888.341272

C 1.3288 0.2025 1.8982

C 0.4940 1.3577 1.6126

C -0.8953 0.9867 1.8077

C -0.8905 -0.4093 2.2303

C 0.4780 -0.8508 2.3316

W -0.1588 -0.2127 0.0000

C 1.3288 0.2025 -1.8982

C 0.4780 -0.8508 -2.3316

C -0.8905 -0.4093 -2.2303

C -0.8953 0.9867 -1.8077

C 0.4940 1.3577 -1.6126

C -0.0447 -2.4582 0.0000

C 1.0045 2.7706 -1.5792

C 2.8306 0.1913 -1.9383

C 0.9536 -2.1573 -2.8973

C -2.0877 -1.1781 -2.7125

C -2.0652 1.9246 -1.9038

C 1.0045 2.7706 1.5792

C 2.8306 0.1913 1.9383

C 0.9536 -2.1573 2.8973

C -2.0877 -1.1781 2.7125

C -2.0652 1.9246 1.9038

H -0.5605 -2.8751 -0.8707

H 0.9873 -2.8410 0.0000

H -0.5605 -2.8751 0.8707

H -1.7733 -0.7026 0.0000

H 1.1241 3.1340 -2.6107

H 0.3144 3.4523 -1.0769

H 1.9790 2.8560 -1.0921

H 3.2045 0.5373 -2.9137

H 3.2638 0.8467 -1.1756

H 3.2265 -0.8156 -1.7717

H 1.3778 -1.9946 -3.8981

H 1.7303 -2.6179 -2.2787

H 0.1390 -2.8775 -2.9984

H -2.1576 -1.1510 -3.8098

H -2.0476 -2.2289 -2.4073

H -3.0117 -0.7583 -2.3057

H -2.1998 2.2985 -2.9307

H -2.9935 1.4285 -1.6043

H -1.9375 2.7940 -1.2510

H 0.3144 3.4523 1.0769

H 1.1241 3.1340 2.6107

H 1.9790 2.8560 1.0921

H 3.2045 0.5373 2.9137

H 3.2265 -0.8156 1.7717

H 3.2638 0.8467 1.1756

H 1.3778 -1.9946 3.8981

H 0.1390 -2.8775 2.9984

H 1.7303 -2.6179 2.2787

H -2.1576 -1.1510 3.8098

H -3.0117 -0.7583 2.3057

H -2.0476 -2.2289 2.4073

H -2.1998 2.2985 2.9307

H -1.9375 2.7940 1.2510

H -2.9935 1.4285 1.6043

1Cp*2W(H)(CH3) 6-31G**

-888.575694

C -1.8797 0.1959 1.3057

C -1.6033 1.3418 0.4681

C -1.7984 0.9661 -0.9102

C -2.2185 -0.4221 -0.8981

C -2.3120 -0.8576 0.4648

W -0.0000 -0.2289 -0.1715

C 1.8826 0.2088 1.3036

C 2.3005 -0.8662 0.4836

C 2.2139 -0.4537 -0.8882

C 1.8100 0.9392 -0.9251

C 1.6189 1.3417 0.4452

C -0.0116 -2.4809 -0.0677

C 1.5862 2.7671 0.9193

C 1.9144 0.2320 2.8054

C 2.8514 -2.1644 0.9944

C 2.6976 -1.2507 -2.0665

C 1.9141 1.8470 -2.1178

C -1.5624 2.7572 0.9713

C -1.9175 0.1922 2.8076

C -2.8813 -2.1578 0.9499

C -2.7066 -1.1945 -2.0909

C -1.8916 1.8979 -2.0853

H 0.8554 -2.9017 -0.5817

H -0.0211 -2.8940 0.9502

H -0.8740 -2.8931 -0.5965

H -0.0041 -0.7164 -1.7783

H 2.6173 3.1315 1.0221

H 1.0819 3.4319 0.2158

H 1.1070 2.8798 1.8937

H 2.8996 0.5500 3.1738

H 1.1781 0.9270 3.2187

H 1.7093 -0.7556 3.2270

H 3.8715 -2.0048 1.3672

H 2.2576 -2.5681 1.8186

H 2.9019 -2.9255 0.2148

H 3.7926 -1.2080 -2.1433

H 2.4119 -2.3035 -1.9927

H 2.2801 -0.8657 -2.9994

H 2.9423 2.2114 -2.2568

H 1.6169 1.3302 -3.0338

H 1.2677 2.7226 -2.0153

H -1.0591 3.4353 0.2799

H -2.5917 3.1229 1.0869

H -1.0786 2.8476 1.9460

H -2.8976 0.5232 3.1785

H -1.7345 -0.8073 3.2109

H -1.1687 0.8633 3.2374

H -3.8989 -1.9901 1.3259

H -2.9431 -2.9021 0.1550

H -2.2940 -2.5868 1.7658

H -3.8010 -1.1411 -2.1688

H -2.2840 -0.7975 -3.0163

H -2.4299 -2.2509 -2.0342

H -2.9141 2.2815 -2.2141

H -1.2305 2.7607 -1.9682

H -1.6056 1.3943 -3.0123

W(Cp*)(C5Me4CH2)(H) "tucked"

LACVP -847.832744

C -0.0154 0.1992 0.0002

C -0.0607 0.1077 1.4515

C 1.2861 -0.0306 1.9531

C 2.1851 -0.0707 0.7860

C 1.3572 0.1351 -0.4048

W 0.9692 -1.9006 0.7004

C -0.5568 -3.6621 0.4065

C 0.7149 -4.2125 0.0147

C 1.6111 -4.1552 1.1365

C 0.9065 -3.5997 2.2699

C -0.4487 -3.2935 1.8147

C -1.6129 -2.9771 2.7126

C -1.8227 -3.6971 -0.4034

C 1.0199 -4.8228 -1.3233

C 3.0195 -4.6778 1.1625

C 1.3876 -3.6152 3.6934

C -1.2831 0.3784 2.2814

C -1.1875 0.5032 -0.8881

C 1.8776 0.3249 -1.8006

C 3.1696 -1.1375 0.8012

C 1.7260 0.0413 3.3874

H -2.0850 -3.9043 3.0697

H -1.3065 -2.4083 3.5961

H -2.3843 -2.3971 2.1967

H -2.3628 -4.6467 -0.2668

H -2.5053 -2.8901 -0.1166

H -1.6150 -3.5839 -1.4724

H 0.7321 -5.8839 -1.3333

H 0.4735 -4.3190 -2.1260

H 2.0857 -4.7633 -1.5610

H 3.0394 -5.7362 1.4611

H 3.4970 -4.6002 0.1810

H 3.6377 -4.1207 1.8726

H 1.1931 -4.5884 4.1695

H 2.4650 -3.4284 3.7545

H 0.8889 -2.8511 4.2983

H -1.2066 -0.0659 3.2778

H -1.4187 1.4615 2.4163

H -2.1935 -0.0082 1.8128

H -1.3754 1.5862 -0.9450

H -1.0163 0.1425 -1.9069

H -2.1044 0.0309 -0.5206

H 1.9949 1.3965 -2.0170

H 2.8558 -0.1479 -1.9258

H 1.2025 -0.1008 -2.5493

H 3.6973 -1.3210 1.7340

H 1.5340 -2.1516 -0.8821

H 3.7764 -1.3037 -0.0845

H 1.9013 1.0834 3.6934

H 0.9758 -0.3775 4.0673

H 2.6587 -0.5085 3.5474
